1  
2  
3  
4  
5  
6  
7  
8  
9  
10  
11  
12  
13  
14  
15  
16  
17  
18  
19  
20  
21

**Functional impact of the H2A.Z histone variant during meiosis in**  
*Saccharomyces cerevisiae*

Sara González-Arranz\*, Santiago Caveró\*, Macarena Morillo-Huesca<sup>†</sup>, Eloisa Andújar<sup>‡</sup>,  
Mónica Pérez-Alegre<sup>‡</sup>, Félix Prado<sup>†</sup> and Pedro San-Segundo\*, <sup>1</sup>

\*Institute of Functional Biology and Genomics (IBFG). Consejo Superior de Investigaciones Científicas (CSIC) and University of Salamanca, 37007 Salamanca, Spain

<sup>†</sup>Department of Genome Biology and <sup>‡</sup>Genomics Unit. Centro Andaluz de Biología Molecular y Medicina Regenerativa (CABIMER), CSIC-University of Seville-University Pablo Olavide, 41092 Seville, Spain

21

22

23

24

25

26 Running Title:

27 H2A.Z regulates meiotic development

28

29 Keywords:

30 Meiosis, meiotic recombination checkpoint, H2A.Z histone variant, gametogenesis,

31 *Saccharomyces cerevisiae*

32

33

34 <sup>1</sup>Corresponding author:

35 Pedro A. San Segundo

36 Instituto de Biología Funcional y Genómica

37 CSIC-University of Salamanca

38 Zacarías González, 2

39 37007 Salamanca, Spain

40

41 Phone: +34 923294902

42 E-mail: pedross@usal.es

43

43 **Abstract**

44

45 Among the collection of chromatin modifications that influence its function and structure, the  
46 substitution of canonical histones by the so-called histone variants is one of the most  
47 prominent actions. Since crucial meiotic transactions are modulated by chromatin, here we  
48 investigate the functional contribution of the H2A.Z histone variant during both unperturbed  
49 meiosis and upon challenging conditions where the meiotic recombination checkpoint is  
50 triggered in budding yeast by the absence of the synaptonemal complex component Zip1. We  
51 have found that H2A.Z localizes to meiotic chromosomes in an SWR1-dependent manner.  
52 Although meiotic recombination is not substantially altered, the *htz1* mutant (lacking H2A.Z)  
53 shows inefficient meiotic progression, impaired sporulation and reduced spore viability.  
54 These phenotypes are likely accounted for by the misregulation of meiotic gene expression  
55 landscape observed in *htz1*. In the *zip1* mutant, the absence of H2A.Z results in a tighter  
56 meiotic arrest imposed by the meiotic recombination checkpoint. We have found that Mec1-  
57 dependent Hop1-T318 phosphorylation and the ensuing Mek1 activation are not significantly  
58 altered in *zip1 htz1*; however, downstream checkpoint targets, such as the meiosis I-  
59 promoting factors Ndt80, Cdc5 and Clb1, are drastically down-regulated. The study of the  
60 checkpoint response in *zip1 htz1* has also allowed us to reveal the existence of an additional  
61 function of the Swe1 kinase, independent of CDK inhibitory phosphorylation, which is  
62 relevant to restrain meiotic cell cycle progression. In summary, our study shows that the  
63 H2A.Z histone variant impacts various aspects of meiotic development adding further insight  
64 into the relevance of chromatin dynamics for accurate gametogenesis.

65

66

## 66 Introduction

67

68 Sexual reproduction relies on a specialized cell division, meiosis, which reduces  
69 chromosome ploidy by half and is usually accompanied by cell differentiation processes that  
70 culminate in the formation of gametes. The reduction in chromosome complement is achieved  
71 by two consecutive rounds of nuclear division preceded by a single round of DNA replication.  
72 Premeiotic S phase is followed by a long prophase I in which, prior to the first meiotic  
73 division, homologous chromosomes (homologs) pair, synapse and recombine. Meiotic  
74 recombination is initiated by programmed DNA double-strand breaks (DSBs) generated by  
75 the Spo11 protein and a cohort of regulatory factors (Keeney *et al.* 2014). During the repair of  
76 a subset of these meiotic DSBs, crossovers between homologs are formed, which are essential  
77 for correct distribution of chromosomes to the meiotic progeny. Alignment of homologous  
78 chromosomes -pairing- and the stabilization of these interactions by the synaptonemal  
79 complex (SC) -synapsis- influence meiotic recombination outcomes (Hunter 2015). These  
80 crucial meiotic events are monitored by the so-called meiotic recombination checkpoint  
81 (MRC), an evolutionarily-conserved surveillance mechanism that senses defective synapsis  
82 and/or recombination and imposes a block or delay in meiotic cell progression providing time  
83 to fix the faulty process in order to prevent aberrant chromosome segregation. The meiotic  
84 checkpoint network also operates in unperturbed meiosis to ensure the proper sequential  
85 execution of events (MacQueen and Hochwagen 2011; Subramanian and Hochwagen 2014).

86 In this work, we have used the *zip1* mutant of the budding yeast *Saccharomyces*  
87 *cerevisiae* as a genetic tool to activate the MRC. Zip1 is a major structural component of the  
88 SC central region and *ZIP1* deletion impairs synapsis and crossover recombination (Dong and  
89 Roeder 2000; Borner *et al.* 2004; Voelkel-Meiman *et al.* 2015); as a consequence, the *zip1*  
90 mutant experiences a significant MRC-dependent delay in the prophase to meiosis I transition  
91 (Herruzo *et al.* 2016). The *zip1*-induced defects are detected by the Mec1-Ddc2<sup>(ATR-ATRIP)</sup>  
92 complex resulting in phosphorylation of the Hop1 checkpoint adaptor at several residues,  
93 including T318 (Carballo *et al.* 2008; Refolio *et al.* 2011; Penedos *et al.* 2015). The Hop1  
94 protein is a component of the lateral elements of the SC; its abundance, dynamics and  
95 phosphorylation state at chromosome axes in response to checkpoint activation are finely  
96 tuned by the AAA+ ATPase Pch2 (Herruzo *et al.* 2016). Phosphorylated Hop1 recruits the  
97 meiosis-specific Mek1 protein to chromosomes facilitating the activation of this Rad53/Chk2-  
98 related kinase containing an FHA domain in two steps: first by Mec1-dependent

99 phosphorylation and subsequently by *in trans* autophosphorylation of Mek1 dimers on its  
100 activation loop (Niu *et al.* 2005; Ontoso *et al.* 2013). In turn, active Mek1 stabilizes Hop1-  
101 T318 phosphorylation at chromosomes (Chuang *et al.* 2012). Mek1 promotes interhomolog  
102 recombination bias by the direct phosphorylation of the recombination mediator Rad54 at  
103 T154 to attenuate its interaction with the strand-exchange Rad51 protein (Niu *et al.* 2009).  
104 Also, the phosphorylation of Hed1 at Thr40 stabilizes this protein stimulating its inhibitory  
105 action on Rad51 (Callender *et al.* 2016). Mek1 also exerts a spatial control on recombination  
106 bias by a synapsis-dependent mechanism involving Pch2 (Subramanian *et al.* 2016). In  
107 addition, Mek1 is essential for the meiotic checkpoint response to the accumulation of  
108 unrepaired DSBs and to the *zip1*-induced synapsis and/or recombination defects (Xu *et al.*  
109 1997; Ontoso *et al.* 2013; Prugar *et al.* 2017). The arrest or delay at meiotic prophase I  
110 imposed by the MRC is established by two interconnected mechanisms: down-regulation of  
111 the Ndt80 transcription factor and inhibitory phosphorylation of Cdc28<sup>CDK1</sup> (Subramanian and  
112 Hochwagen 2014). Ndt80 is a master regulator of yeast meiotic development that activates the  
113 transcription of a number of genes involved in meiotic divisions and spore formation (Winter  
114 2012). Among the gene products regulated by Ndt80, the polo-like kinase Cdc5 and the type-  
115 B Clb1 cyclin are crucial factors to promote exit from prophase (Tung *et al.* 2000; Sourirajan  
116 and Lichten 2008; Acosta *et al.* 2011; Argunhan *et al.* 2017). Inhibition and nuclear exclusion  
117 of Ndt80 by the checkpoint prevents the wave of meiotic induction of Clb1 required for entry  
118 into meiosis I (Wang *et al.* 2011). In addition, stabilization of Swe1 by MRC action also  
119 maintains Cdc28<sup>CDK</sup> inhibited by Tyr19 phosphorylation (Leu and Roeder 1999). In sum, the  
120 lack of Clb1 induction together with the inhibitory phosphorylation of Cdc28 restrains  
121 prophase I exit by keeping in check CDK activity levels.

122 Most of DNA meiotic transactions occur in the context of highly specialized  
123 chromosome and chromatin structures. Chromatin dynamics can be modulated by several  
124 processes, including posttranslational modification (PTM) of histones and incorporation of  
125 histone variants. Among the myriad of histone PTMs described to date, a meiotic function has  
126 been ascribed to a number of them (Brachet *et al.* 2012; Wang *et al.* 2017). In particular,  
127 H3K79 methylation and H4K16 acetylation are involved in the budding yeast MRC (Ontoso  
128 *et al.* 2013; Cavero *et al.* 2016). Much less is known about the meiotic functional contribution  
129 of histone variants; in particular, one of the most prominent such as H2A.Z, a variant of the  
130 canonical histone H2A conserved in evolution from yeast to human.

131 In vegetative yeast cells, H2A.Z is involved in multiples processes, including  
132 transcription regulation (both positively and negatively), maintenance of genome stability and

133 chromatin silencing (Billon and Cote 2013; Weber and Henikoff 2014). H2A.Z is  
134 preferentially found in the vicinity of promoters at nucleosomes flanking a nucleosome-  
135 depleted region containing the transcription start site (Raisner *et al.* 2005). Nevertheless, not  
136 all the functions of H2A.Z are necessarily related to transcription; for example, H2A.Z is also  
137 deposited at persistent DSBs promoting their anchorage to the nuclear periphery and  
138 stimulating resection (Kalocsay *et al.* 2009; Adkins *et al.* 2013; Horigome *et al.* 2014). The  
139 incorporation of H2A.Z to chromatin is carried out by the SWR1 complex, which utilizes the  
140 energy of ATP hydrolysis to exchange canonical H2A-H2B by H2A.Z-H2B dimers in  
141 particular nucleosomes (Krogan *et al.* 2003; Kobor *et al.* 2004; Mizuguchi *et al.* 2004).

142 The number of studies addressing the role(s) of H2A.Z during meiosis is much scarce,  
143 although H2A.Z also appears to perform meiotic functions in several model organisms. In  
144 *Arabidopsis thaliana*, H2A.Z is associated to meiotic recombination hotspots and colocalizes  
145 with chromosomal foci of the Dmc1 and Rad51 recombinases; moreover, meiocytes from the  
146 *arp6* mutant (lacking a component of the SWR1 complex) show reduced number of Dmc1,  
147 Rad51 and Mlh1 foci suggesting a role for H2A.Z in the formation and/or processing of  
148 meiotic DSBs (Choi *et al.* 2013). Meiotic gene expression is also altered in the *arp6* mutant of  
149 *A. thaliana* (Qin *et al.* 2014). During mouse spermatogenesis, H2A.Z is first detected at  
150 pachytene, but excluded from the sex-body, where it accumulates at later stages. Based on the  
151 dynamics of chromosomal distribution during mammalian spermatogenesis a role for H2A.Z  
152 in meiotic sex chromosome inactivation has been proposed (Greaves *et al.* 2006; Ontoso *et al.*  
153 2014). Recently, a transcription-independent function of H2A.Z in meiotic DSB generation  
154 by modulating chromosomal architecture in the fission yeast *Schizosaccharomyces pombe* has  
155 been reported (Yamada *et al.* 2018).

156 In contrast to most organisms where the absence of H2A.Z is not compatible with life,  
157 the *htz1* deletion mutant in *S. cerevisiae* (lacking H2A.Z) is viable, allowing us to directly  
158 assess its meiotic functional impact. In most cases the role of H2A.Z in other organisms has  
159 been inferred indirectly by analyzing mutants of the SWR1 complex or by cytological  
160 observations. In this work, we demonstrate that H2A.Z is important for meiosis in the  
161 budding yeast *S. cerevisiae*. We show that the *htz1* mutant displays impaired meiotic  
162 progression and sporulation and that spore viability is compromised, although meiotic  
163 interhomolog recombination does not appear to be strongly affected. The landscape of gene  
164 expression during meiotic prophase is substantially altered in the absence of H2A.Z, likely  
165 contributing to at least some of the *htz1* meiotic phenotypes. Finally, we report that H2A.Z  
166 also functions during the meiotic checkpoint response induced by the *zip1* mutant impacting

167 on the regulators of the prophase to meiosis I transition, such as the Ndt80 transcription factor  
168 and the CDK inhibitory kinase Swe1. Our study reveals the existence of novel functional  
169 connections between these cell cycle regulators.

170

171

## 172 **Materials and Methods**

173

### 174 **Yeast strains**

175 Yeast strains genotypes are listed in Table S1. All the strains, except the ones used in  
176 Figure 1F and Figure S1, are isogenic to the BR1919 background (Rockmill and Roeder  
177 1990). The *htz1::hphMX4*, *swr1::natMX4*, *swr1::hphMX4*, *spo11::natMX4*, *sum1::natMX4*,  
178 *mer3::hphMX4*, *swe1::natMX4*, *[hta1-htb1]::kanMX6* and *[hta2-htb2]::natMX4* gene  
179 deletions were made using a PCR-based approach (Longtine *et al.* 1998; Goldstein and  
180 McCusker 1999). The *htz1::URA3* deletion was made using the pTK17 plasmid digested with  
181 *HindIII-SalI* (Santisteban *et al.* 2000). The *zip1::LYS2*, *mek1::kanMX6*, *ddc2::TRP1*,  
182 *sml1::kanMX6*, *spo11::ADE2*, *swe1::LEU2* and *rad51::natMX4* gene deletions were  
183 previously described (Leu and Roeder 1999; San-Segundo and Roeder 1999; Refolio *et al.*  
184 2011; Ontoso *et al.* 2013; Herruzo *et al.* 2016). *HTZ1-GFP* and *MIH1-GFP* were made by  
185 PCR using pKT127 (Sheff and Thorn 2004) and pFA6a-kanMX6-GFP (Longtine *et al.* 1998),  
186 respectively. The *P<sub>GALI</sub>-ZIPI-GFP* and *P<sub>GDP1</sub>-GAL4(848).ER* constructs were obtained from  
187 Amy Macqueen (Wesleyan University, CT, USA) (Voelkel-Meiman *et al.* 2012). Strains  
188 carrying Swe1 tagged with 3 copies of the MYC epitope at the N terminus and strains  
189 carrying *ZIPI-GFP* have been previously described (Leu and Roeder 1999; White *et al.*  
190 2004). The kinase-dead *swe1-N584A* allele was generated using the *delitto perfetto* approach  
191 (Stuckey *et al.* 2011). Strains carrying the *cdc28-AF* mutation, in which Thr18 and Tyr19 of  
192 Cdc28 have been changed to alanine and phenylalanine, respectively, were generated by  
193 transformation with the plasmid pR2042 digested with *BspI* (Leu and Roeder 1999). The  
194 *htb1-Y40F* mutant strains in which the Y40 of histone H2B has been mutated to  
195 phenylalanine carry the deletion of the *HTA1-HTB1* and *HTA2-HTB2* genomic loci and a  
196 centromeric plasmid (pSS348) expressing *HTA1-htb1-Y40F*. These strains were generated as  
197 follows. A diploid heterozygous for *[hta1-htb1]::kanMX6* and *[hta2-htb2]::natMX4*  
198 containing the *URA3*-based pSS345 plasmid expressing wild-type *HTA1-HTB1* was  
199 transformed with the *TRP1*-based pSS347 or pSS348 plasmids expressing wild-type *HTA1-*



200 *HTB1* (as control) or *HTA1-htb1-Y40F*, respectively (see plasmid construction below). These  
201 diploids were sporulated and Ura- Trp<sup>+</sup> haploid segregants harboring [*hta1-htb1*]::kanMX6  
202 and [*hta2-htb2*]::natMX4 genomic deletions and the pSS347 or pSS348 plasmid as the only  
203 source for H2A-H2B or H2A-H2BY40F, respectively, were selected. In all cases, gene  
204 deletions, mutations and tagging in haploid strains were made by direct transformation with  
205 PCR-amplified cassettes and/or digested plasmids, or by genetic crosses and sporulation  
206 (always in an isogenic background) followed by selection of the desired segregants. Diploids  
207 were made by mating the corresponding haploid parents and isolation of zygotes by  
208 micromanipulation.

209

## 210 **Plasmids**

211 The plasmids used in this work are listed in Table S2. The 2 $\mu$ -based high-copy  
212 pSS248 plasmid contains the meiosis-specific *HOP1* promoter driving the expression of GFP.  
213 In-frame cloning of a gene ORF after the GFP in pSS248 leads to overproduction of the GFP-  
214 fusion specifically during meiotic prophase. pSS248 was constructed as follows. First, the  
215 *HOP1* promoter (650 bp) was amplified from genomic DNA and cloned into the *Bgl*II-*Pac*I  
216 sites of pFA6a-kanMX6-GAL1-GFP (Longtine *et al.* 1998) replacing the *GAL1* promoter by  
217 the *HOP1* promoter to generate pSS232. Then, the *P<sub>HOP1</sub>-GFP* fragment from pSS232 was  
218 amplified by PCR with oligonucleotides containing the appropriate restriction sites and  
219 cloned into *Spe*I-*Not*I of pYES2 (Invitrogene) to replace *P<sub>GAL1</sub>* by *P<sub>HOP1</sub>-GFP* generating  
220 pSS248. The pSS265 plasmid to overexpress *MIH1* during meiosis was constructed by PCR  
221 amplification of the *MIH1* ORF flanked by *Not*I-*Spe*I sites and cloning into *Not*I-*Xba*I of  
222 pSS248. For meiotic overexpression of *BDF1* the ORF flanked by *Not*I-*Sph*I sites was  
223 amplified by PCR and cloned into the same sites of pSS248 to generate pSS354. Plasmid  
224 pSS263 was generated by cloning a 2.7-kb *Not*I-*Sal*I fragment from pSS200 (=p1-1) (Pak and  
225 Segall 2002) containing *NDT80* plus the promoter and 3'UTR regions into the same sites of  
226 the high-copy vector pRS426. The *HTA1-HTB1* genomic region containing the genes  
227 encoding histones H2A and H2B expressed from a common divergent promoter including  
228 also 285 and 540 bp of the flanking 3'UTR sequences was amplified by PCR from genomic  
229 DNA and cloned into the *Bam*HI-*Sal*I sites of the centromeric vectors pRS316 and pRS314 to  
230 generate plasmids pSS345 and pSS347, respectively. The *htb1-Y40F* mutation was introduced  
231 by site-directed mutagenesis of pSS347 to generate pSS348. All constructs were verified by  
232 sequencing. Oligonucleotide sequences are available upon request.

233



## 234 **Meiotic time courses, sporulation efficiency and spore viability**

235 For meiotic time courses, BR strains were grown in 3.5 ml of 2xSC medium for 20 -  
236 24 hours (2% Glucose, 0.7% Yeast Nitrogen Base without amino acids, 0.05% Adenine and  
237 Complete Supplement Mixture from Formedium at twice the particular concentration  
238 indicated by the manufacturer), then transferred to YPDA (2.5 ml) and incubated to saturation  
239 for additional 8 hours. Cells were harvested, washed with 2% potassium acetate (KAc),  
240 resuspended into 2% KAc (10 ml) and incubated at 30°C with vigorous shaking to induce  
241 meiosis and sporulation. Both YPDA and 2% KAc were supplemented with 20 mM adenine  
242 and 10 mM uracil. The culture volumes were scaled-up when needed. To score meiotic  
243 nuclear divisions, samples were taken at different time points, fixed in 70% Ethanol, washed  
244 in PBS and stained with 1 mg/ml DAPI for 15 min. At least 300 cells were counted at each  
245 time point. Meiotic time courses were repeated several times. To induce *ZIPI-GFP* from the  
246 *P<sub>GALI</sub>* promoter in strains expressing *GAL4.ER*, 1 mM  $\beta$ -estradiol (Sigma E2257; dissolved in  
247 ethanol) was added to the cultures. Sporulation efficiency was quantitated by microscopic  
248 examination of asci formation after 3 days on sporulation plates. Both mature and immature  
249 asci were scored. At least 300 cells were counted for every strain. Spore viability was  
250 assessed by tetrad dissection. At least 144 spores were scored for every strain.

251

## 252 **Western blotting**

253 Total cell extracts were prepared by TCA precipitation from 5-ml aliquots of  
254 sporulation cultures as previously described (Acosta *et al.* 2011). Analysis of Mek1  
255 phosphorylation using Phos-tag gels was performed as reported (Ontoso *et al.* 2013). The  
256 antibodies used are listed in Table S3. The ECL or ECL2 reagents (ThermoFisher Scientific)  
257 were used for detection. The signal was captured on films and/or with a ChemiDoc XRS  
258 system (Bio-Rad).

259

## 260 **Fluorescence microscopy**

261 Immunofluorescence of chromosome spreads was performed essentially as described  
262 (Rockmill 2009). For analysis of spindle formation by whole-cell immunofluorescence, the  
263 following protocol was used. Cells from meiotic cultures (1.5 ml) were fixed with 3.7%  
264 formaldehyde for 45 minutes, washed twice with solution A (1.2 M Sorbitol, 0.05 M  
265  $\text{KH}_2\text{PO}_4$ ) and resuspended into the same solution containing 0.1 mg/ml 20T Zymolyase, 0.1%  
266 Glusulase and 0.001%  $\beta$ -mercaptoethanol. Samples were incubated at 37°C for 20-30 minutes  
267 monitoring spheroplast formation. After two washes with ice-cold Solution A, cells were

268 resuspended into 50  $\mu$ l of this solution. 25  $\mu$ l were deposited onto a polylysine-coated 8-well  
269 glass slide and let stand for 30 minutes. Liquid was carefully aspirated and the slide was  
270 submerged into -20°C methanol for 6 minutes and -20°C acetone for 30 seconds using a  
271 Coplin jar. The wells were successively rinsed with 1% BSA in PBS, 1% BSA 0.1% NP-40 in  
272 PBS (twice) and 1% BSA in PBS, and incubated overnight with the anti-tubulin antibody in  
273 1% BSA-PBS at 4°C. Wells were then rinsed as described above, incubated with the  
274 secondary antibody for 2 hours at room temperature and rinsed again. A drop of Vectashield  
275 containing DAPI (Vector Laboratories, H-1200) was deposited and extended with a coverslip  
276 sealed with nail polish. The antibodies used are listed in Table S3. Images of spreads and  
277 fixed whole cells were captured with a Nikon Eclipse 90i fluorescence microscope controlled  
278 with MetaMorph software and equipped with a Hamamatsu Orca-AG CCD camera and a  
279 PlanApo VC 100x1.4 NA objective. Images of fluorescent spores as well as *ZIPI-GFP* and  
280 *HTZI-GFP* live cells were captured with an Olympus IX71 fluorescence microscope  
281 equipped with a personal DeltaVision system, a CoolSnap HQ2 (Photometrics) camera and  
282 100x UPLSAPO 1.4 NA objective. For Zip1-GFP and Htz1-GFP, stacks of 10 planes at 0.4  
283  $\mu$ m intervals were captured. Maximum intensity projections of deconvolved images were  
284 generated using the SoftWorRx 5.0 software (Applied Precisions). DAPI images were  
285 collected using a Leica DMRXA fluorescence microscope equipped with a Hamamatsu  
286 Orca-AG CCD camera and a 63x 1.4 NA objective.

287

### 288 **Recombination frequency**

289 To measure genetic distances in a chromosome VIII interval we used a spore-  
290 autonomous fluorescence assay in SK1 strains as previously described (Thacker *et al.* 2011).  
291 Basically, diploid SK1 cells were patched on YEP-glycerol plates, streaked on YPD plates  
292 and single colonies were inoculated into 2 ml of liquid YPD incubated at 30°C for 20 h. Cells  
293 were transferred to 10 ml of YPA (1% yeast extract, 2% peptone, 2% KAc), incubated at  
294 30°C for 14 h and sporulated in 10 ml of 2% potassium acetate containing 0.001%  
295 polypropylene glycol to prevent aggregation. Asci with fluorescent spores were imaged after  
296 48 h in sporulation. Samples were sonicated for 15 sec before imaging. The “cell counter”  
297 plugin of ImageJ (<http://imagej.nih.gov/ij/plugins/cell-counter.html>) was used to manually  
298 score the tetrads of each type. Genetic distances (cM) were calculated using the Perkins  
299 equation:  $cM = (100 (6NPD + T))/(2(PD + NPD + T))$ , where PD is the number of parental  
300 ditypes, NPD is the number of nonparental ditypes and T is the number of tetratypes.

301

## 302 **Meiotic transcriptome analysis.**

303 Global analysis of gene expression during meiotic prophase was carried essentially as  
304 described (Morillo-Huesca *et al.* 2010). Briefly, gene expression profiles were determined  
305 using the “GeneChip™ Yeast Genome 2.0 Array” of Affymetrix at CABIMER Genomics  
306 Unit (Seville, Spain). Total RNA from meiotic prophase cells (15 hours after meiotic  
307 induction) was isolated using the RNeasy® Midi kit (Qiagen) and its quality confirmed by  
308 Bioanalyzer® 2100 (Agilent technology). Synthesis, labeling and hybridization of cDNA was  
309 performed with RNA from 3 independent cultures of each strain following Affymetrix  
310 protocols (<http://www.affymetrix.com/analysis/index.affx>). Probe signal intensities were  
311 extracted from the scanned images and analyzed with the GeneChip Operating Software  
312 1.4.0.036 (Affymetrix). The raw data (CEL files) were preprocessed and normalized using the  
313 Robust Multichip Average (RMA) method. Fold-change values (log<sub>2</sub>) and their FDR-adjusted  
314 p-values were calculated with Limma (Linear Models for Microarray Analysis using the  
315 *affy* GUI interface. All the statistical analysis was performed using R language and the  
316 packages freely available from “Bioconductor Project” (<http://www.bioconductor.org>). Fold-  
317 change cutoffs were analyzed at 95% confidence levels (FDR-adjusted p-values<0.05). All  
318 data is MIAME compliant and the raw data have been deposited at the Miame compliant  
319 Gene Expression Omnibus (GEO) database at the National Center for Biotechnology  
320 Information (<http://www.ncbi.nlm.nih.gov/geo/>) and are accessible through accession number  
321 GSE110022. Gene ontology and functional clustering analyses were performed using DAVID  
322 tools (Database for Annotation, Visualization and Integrated Discovery) (Huang *et al.* 2007).

323

## 324 **Quantitative RNA analysis.**

325 The amount of mRNA was determined by real-time PCR (RT-PCR) amplification of  
326 cDNA generated by reverse transcription and RNaseH treatment (SuperScript II Reverse  
327 Transcriptase; Invitrogen) of the RNA samples obtained for the microarray hybridization  
328 analysis. Amplification of *ACT1* was used to normalize for differences in the amount of input  
329 RNA. Similar results were obtained after normalization with *NUP84* (data not shown).  
330 Primers were designed using the Primer Express software (Applied Biosystems) and their  
331 sequence is available upon request.

332

## 333 **Statistics**

334 Unless specified, to determine the statistical significance of differences a two-tailed  
335 Student *t*-test was used. *P*-Values were calculated with the GraphPad Prism 5.0 software. The

336 nature of errors bars in graphical representations and the number of biological replicates (n) is  
337 indicated in the corresponding figure legend. For analysis of statistical significance in Venn  
338 diagrams a hypergeometric test was applied.

339

#### 340 **Data availability**

341 All relevant data necessary for confirming the conclusions presented are within the  
342 article and Supplemental Information (GSA Figshare). Strains and plasmids are available  
343 upon request. Microarray raw data are deposited at GEO repository under GSE110022  
344 accession number (<https://www.ncbi.nlm.nih.gov/geo/query/acc.cgi?acc=GSE110022>).

345

346

## 347 **Results**

348

### 349 **H2A.Z localizes to meiotic prophase chromosomes in a SWR1-dependent manner**

350

351 To investigate the localization of H2A.Z during meiotic prophase we generated a  
352 functional version of this histone variant tagged with the green fluorescent protein (GFP).  
353 Live wild-type cells observed by fluorescence microscopy 15 h after meiotic induction (peak  
354 of prophase in the BR strain background) displayed the H2A.Z-GFP signal along elongated  
355 structures likely corresponding with zygotene-pachytene chromosomes. In contrast, the *swr1*  
356 mutant showed diffused H2A.Z-GFP throughout the nucleus (Figure 1A). To explore H2A.Z  
357 localization in more detail we performed immunofluorescence of meiotic chromosome  
358 spreads (Figure 1B). In wild-type pachytene chromosomes, H2A.Z decorated all chromatin,  
359 except a particular region of the genome corresponding to the rDNA region, as demonstrated  
360 by the presence of the nucleolar-enriched Pch2 protein (Herruzo *et al.* 2016) (Figure 1B,  
361 arrows). In contrast, pachytene chromosomes of the *swr1* mutant were largely devoid of  
362 chromatin-associated H2A.Z (Figure 1B). These observations indicate that, like in vegetative  
363 cells (Krogan *et al.* 2003; Kobor *et al.* 2004; Mizuguchi *et al.* 2004), the SWR1 complex is  
364 also required for the deposition of H2A.Z into meiotic chromatin. Occasionally, discrete dots  
365 of H2A.Z-GFP accumulation could be observed in *swr1* nuclei. The nature and possible  
366 functional implication of this SWR1-independent localization of H2A.Z will be described  
367 elsewhere. Western blot analysis revealed that global levels of H2A.Z remained fairly  
368 constant throughout the whole meiotic program in the wild type; however, they were

369 gradually diminishing in the *swr1* mutant (Figure 1C), suggesting that chromatin  
370 incorporation stabilizes H2A.Z during meiosis.

371

### 372 **Meiotic progression and sporulation are impaired in the *htz1* mutant**

373

374 To determine whether H2A.Z plays a role in meiotic progression, we followed the  
375 kinetics of meiotic divisions by DAPI-staining of nuclei in wild type and *htz1* strains.  
376 Completion of meiotic divisions was less efficient in the *htz1* mutant compared to the wild  
377 type (Figure 2A). Likewise, sporulation efficiency and spore viability were also reduced in  
378 *htz1*, and asci morphology was altered (Figure 2B-2D). These observations imply that H2A.Z  
379 function is required for normal meiotic development. The *htz1* mutant showed a random  
380 pattern of spore death, with no predominance of four-, two- and zero-spore-viable tetrads  
381 (Figure 2E), suggesting that the reduced spore viability in *htz1* is not resulting, at least  
382 exclusively, from meiosis I non-disjunction events. We also examined crossover  
383 recombination in a chromosome VIII interval between *CEN8* and *THR1* using a microscopic  
384 fluorescence assay that is independent of spore viability (Thacker *et al.* 2011). Recombination  
385 frequency in this interval, measured as map distance (cM), was not altered in the *htz1* mutant  
386 compared to the wild type. As a control, a crossover-defective *mer3* mutant was also included  
387 in the assay (Figure 2F and Figure S1). To assess whether the inefficient meiotic progression  
388 of *htz1* was a consequence of the activation of the meiotic recombination checkpoint we  
389 combined the absence of H2A.Z with that of Spo11 (lacking recombination-initiating meiotic  
390 DSBs) and with that of Mek1 (lacking the main checkpoint effector kinase). The *htz1* delay in  
391 meiotic progression was maintained in the *htz1 spo11* and *htz1 mek1* double mutants (Figures  
392 3A and 3B, respectively). Moreover, the dynamics of various indicators of checkpoint  
393 activity, such as Hop1-T318 phosphorylation (Herruzo *et al.* 2016) and Mek1 activation, as  
394 assessed both by Mek1 autophosphorylation (Ontoso *et al.* 2013) and phosphorylation of its  
395 H3-T11 target (Cavero *et al.* 2016; Kniewel *et al.* 2017), was similar in wild type and *htz1*  
396 (Figure 3C). These results indicate that the lower overall efficiency of meiotic divisions in  
397 *htz1* does not stem from activation of the meiotic recombination checkpoint, and it is  
398 consistent with the observation that meiotic recombination (CO) does not appear to be  
399 significantly affected in the absence of H2A.Z. To explore the possibility that the absence of  
400 H2A.Z affects meiotic entry rather than (or in addition to) meiotic progression we used *ZIP1-*  
401 *GFP* as a reporter for early meiotic gene expression and analyzed the percentage of cells  
402 showing nuclear fluorescence in the wild-type and *htz1* strains shortly after meiotic induction.

403 We found that the kinetics of appearance of Zip1-GFP fluorescence was slightly, but  
404 reproducibly, delayed in the *htz1* mutant, although eventually it reached nearly wild-type  
405 levels (Figure 3D). This observation likely reflects a delay in the onset of the meiotic program  
406 in the absence of H2A.Z and may account, at least in part, for the checkpoint-independent  
407 impaired completion of meiotic divisions in the *htz1* mutant.

408

### 409 **The SWR1 complex partially impairs meiosis in the absence of H2A.Z**

410

411 The SWR1 complex is required to replace H2A-H2B by H2A.Z-H2B dimers at  
412 particular nucleosomes. It has been proposed that the SWR1 complex exerts a deleterious  
413 effect on chromatin integrity in the *htz1* mutant due to the attempt to replace the canonical  
414 histone H2A by H2A.Z in the absence of this histone variant creating nucleosome instability  
415 (Morillo-Huesca *et al.* 2010). As a consequence, deletion of *SWR1* (encoding the catalytic  
416 component of the SWR1 complex) totally or partially suppresses some of the multiple  
417 phenotypes of *htz1* in vegetative cells (Morillo-Huesca *et al.* 2010). Thus, we analyzed the  
418 kinetics of meiotic divisions, sporulation efficiency and spore viability in *swr1* and *htz1 swr1*  
419 mutants. We found that meiotic progression was faster (Figure S2A) and that asci formation  
420 and spore viability were somehow improved in *htz1 swr1* compared to *htz1* (Figure S2B and  
421 S2C), although they did not reach wild-type levels. The *swr1* single mutant showed an  
422 intermediate phenotype between the wild type and *htz1* mutant in meiotic progression and  
423 sporulation efficiency (Figure S2A and S2B). These observations imply that some, but not all,  
424 meiotic phenotypes of *htz1* result from the pathogenic action of SWR1 in the absence of  
425 H2A.Z. Moreover, the fact that *SWR1* deletion only partially suppresses the meiotic defects of  
426 *htz1* also supports a direct impact of H2A.Z chromatin deposition on proper meiotic  
427 development.

428

### 429 **Meiotic gene expression is altered in the *htz1* mutant**

430

431 Several studies have demonstrated that mutation of *HTZI* causes transcriptional  
432 misregulation during vegetative growth (Billon and Cote 2013). To assess the influence of  
433 H2A.Z on general meiotic gene expression we used whole-genome microarray analysis to  
434 compare the transcription profile of wild-type and *htz1* meiotic prophase cells (15 hours after  
435 meiotic induction). We found 611 genes showing differential expression in *htz1* compared to  
436 wild type (1.5-fold cutoff,  $p < 0.05$ ) (Table S4); of those, 339 genes were up-regulated and 272



437 down-regulated. Among the genes whose expression was increased in the absence of H2A.Z,  
438 genes encoding ribosomal proteins were on the top of the list ordered by linear-fold change  
439 (LFC) (Table S4). On the top positions of the genes whose expression was significantly  
440 down-regulated in the *htz1* mutant we found genes involved in the MEN (Mitotic Exit  
441 Network) pathway (*BFA1*, *LTE1*) and PP1 phosphatase regulators (*GIP14*, *GAC1*) (Table S4).  
442 Although there were no meiosis-specific genes among those whose mRNA levels showed a  
443 strong change, it was possible to find some genes with meiotic functions, chromatin, DNA  
444 damage response and cell-cycle related events with a LFC>1.5 (Table 1). The reduced  
445 expression of some of these genes in the *htz1* mutant was verified by RT-PCR analysis of the  
446 same mRNA samples used in the microarrays (Figure S3A). Moreover, gene ontology and  
447 clustering analyses of the genes with decreased expression showed a significant enrichment of  
448 functional categories related to both mitotic and meiotic cell cycle regulation (Table S4). On  
449 the contrary, genes with increased expression in *htz1*, cluster mainly in ribosome biogenesis,  
450 translation and metabolic processes (Table S4). Since genes encoding ribosomal proteins are  
451 rapidly repressed upon meiotic induction (Chu *et al.* 1998), this observation is consistent with  
452 the slight delay in meiosis entry of the *htz1* mutant (Figure 3D). Interestingly, 133 of 611  
453 genes ( $p=5 \times 10^{-5}$ ) with differential level of expression between wild type and *htz1* during  
454 meiotic prophase identified in this study overlap with those affected by *htz1* (948 genes) in  
455 mitotically growing cells (Morillo-Huesca *et al.* 2010) (Figure S3B).

456 Thus, these analyses revealed that the meiotic transcriptional landscape is significantly  
457 disturbed in *htz1*, suggesting that the pleiotropic phenotypes of the *htz1* mutant (aberrant  
458 morphology, inefficient meiotic development, low spore viability...) could stem from the  
459 more or less subtle alteration of multiple mechanisms.

460

### 461 **The *zip1 htz1* mutant displays a tight checkpoint-dependent meiotic arrest**

462

463 Next, we sought to explore the possible role of H2A.Z during challenged meiosis; that  
464 is, under conditions in which meiotic defects trigger the meiotic recombination checkpoint.  
465 We used the *zip1* mutant, which is defective in CO recombination and SC formation, to  
466 induce the checkpoint. The *zip1* mutant arrests in prophase I for a long period, but eventually,  
467 at late time points, a fraction of the culture completes the meiotic divisions to generate largely  
468 inviable spores (Figure 4A) (Ontoso *et al.* 2013). Strikingly, we found that meiotic  
469 progression was completely blocked in the *zip1 htz1* double mutant as most cells remained  
470 uninucleated during the whole time course (Figure 4A). This observation suggests that H2A.Z



471 may have a role during prophase I exit because its absence, combined with that of Zip1,  
472 provokes a strong meiotic arrest.

473 Like in the wild-type (Figure 1), chromatin incorporation and stability of H2A.Z also  
474 depended on SWR1 in the *zip1* mutant (Figure S4A-S4B). To determine whether the impact  
475 of *htz1* on the inability to resume meiotic progression in *zip1* was a consequence of the  
476 deleterious effect of SWR1 as explained above, we analyzed the kinetics of meiotic divisions  
477 in *zip1 swr1* and *zip1 htz1 swr1* mutants. Interestingly, like *zip1 htz1*, the *zip1 swr1* and *zip1*  
478 *htz1 swr1* mutants also showed a tight meiotic block (Figure S4C). Since the *swr1* single  
479 mutant is able to complete meiosis, albeit with a small delay compared to the wild type, these  
480 results indicate that the strong meiotic arrest of *zip1 htz1*, *zip1 swr1* and *zip1 htz1 swr1* stems  
481 from the lack of H2A.Z chromatin deposition and does not result from the indirect toxic effect  
482 of SWR1 in the absence of H2A.Z.

483 To ascertain whether the *zip1 htz1* block was caused by the meiotic recombination  
484 checkpoint we generated the *zip1 htz1 spo11* mutant, in which meiotic DSBs are not formed  
485 (Keeney *et al.* 1997), and the *zip1 htz1 ddc2* mutant, in which meiotic recombination  
486 intermediates are not sensed (Refolio *et al.* 2011). We found that meiotic divisions and  
487 sporulation were largely restored in the *zip1 htz1 spo11* and *zip1 htz1 ddc2* mutants (Figure  
488 4B) generating mostly dead spores (5.6% and 1.5% spore viability for *zip1 htz1 spo11* and  
489 *zip1 htz1 ddc2*, respectively; n=72), thus confirming that the meiotic prophase block in *zip1*  
490 *htz1* is imposed by the meiotic recombination checkpoint.

491

#### 492 **The *zip1 htz1* mutant does not accumulate additional unrepaired DSBs**

493

494 One possible explanation for the more robust meiotic arrest of *zip1 htz1* compared to  
495 that of *zip1* is that the absence of H2A.Z may provoke additional defects that, combined to  
496 those resulting from the lack of Zip1, could lead to further hyperactivation of the meiotic  
497 recombination checkpoint and, therefore, a tighter prophase I block. To test this possibility,  
498 we used immunofluorescence of spread nuclei to analyze the presence of Rad51 foci as an  
499 indirect marker for unrepaired DSBs (Joshi *et al.* 2015) in *zip1* and *zip1 htz1* mutants. The  
500 *zip1 htz1 spo11* mutant was also included as a control for the absence of meiotic DSBs. Due  
501 to the different kinetics of meiotic progression of the strains analyzed (Figure 4A-4B), only  
502 prophase I nuclei, as assessed by the bushy morphology of tubulin staining, were scored  
503 (Figure 4C). We found that the *zip1 htz1* double mutant did not display more Rad51 foci than  
504 *zip1* (Figure 4C), suggesting that the absence of H2A.Z together with that of Zip1 does not

505 generate more unrepaired meiotic DSBs. We also performed immunofluorescence of spread  
506 nuclei using an antibody that recognizes phosphorylated S/T-Q motifs as an additional assay  
507 for Mec1/Tell-dependent DNA damage signaling during meiotic prophase. We found that  
508 phospho-S/T-Q foci were significantly increased in a *dmc1* mutant, used as control, that  
509 accumulates hyper-resected DSBs (Bishop *et al.* 1992), but similarly decorated prophase  
510 chromosomes of *zip1* and *zip1 htz1* (Figure S5). These observations do not favor the  
511 possibility that the accumulation of additional DNA damage is responsible for the  
512 exacerbated meiotic arrest of *zip1 htz1*.

513

#### 514 **Dynamics of upstream checkpoint activation-deactivation is normal in *zip1 htz1***

515

516 To pinpoint what event in the *zip1*-induced MRC pathway is impacted by H2A.Z we  
517 used a battery of molecular markers to analyze checkpoint status during meiotic time courses  
518 of wild type, *zip1* and *zip1 htz1* strains (Figure 4D). Activation of the Mec1-Ddc2 sensor  
519 complex by unrepaired DSBs (and perhaps other types of meiotic defects) is one of the first  
520 events in the meiotic checkpoint pathway (Refolio *et al.* 2011; Subramanian and Hochwagen  
521 2014). Active Mec1 phosphorylates Hop1 at various sites, including T318 (Carballo *et al.*  
522 2008; Penedos *et al.* 2015). In the *zip1*-induced checkpoint, Hop1-T318 phosphorylation is  
523 critical to sustain activation of the Mek1 effector kinase (Herruzo *et al.* 2016), and serves as  
524 an excellent readout for Mec1 activity. Since unrepaired DSBs promote Mec1 activation,  
525 Hop1 phosphorylation has been also used as an indirect assay for DSB formation (Chen *et al.*  
526 2015). In the wild type, there was a weak and transient phosphorylation of Hop1-T318  
527 coincident with the peak of prophase I and ongoing recombination. In contrast, Hop1-T318  
528 phosphorylation was very robust and sustained in the *zip1* mutant (Figure 4D), although at  
529 late time points phospho-Hop1-T318 declined coincident with completion of meiotic  
530 divisions in a fraction of the culture (Figure 4A). Remarkably, despite the tight meiotic arrest  
531 (Figure 4A), the kinetics of Hop1-T318 phosphorylation in the *zip1 htz1* double mutant was  
532 similar to that of *zip1* (Figure 4D), further supporting that the turnover of meiotic DSBs is not  
533 significantly affected by *htz1*.

534 We also monitored the activity of the downstream Mek1 effector kinase using three  
535 different readouts: Mek1 autophosphorylation (Ontoso *et al.* 2013), Hed1 phosphorylation at  
536 T40 (Callender *et al.* 2016) and histone H3 phosphorylation at T11 (Cavero *et al.* 2016). As  
537 shown in Figure 4D, the dynamics of Mek1 activation paralleled that of Hop1-T318

538 phosphorylation (that is, Mec1 activity) and, again, was similar in both *zip1* and *zip1 htz1*,  
539 except for a slight persistence of phospho-H3-T11 in *zip1 htz1* at the latest time point.

540 These results, together with the analysis of Rad51 foci, indicate that the robust meiotic  
541 block in *zip1 htz1* does not arise from the persistence of unrepaired recombination  
542 intermediates sustaining permanent upstream checkpoint activation.

543

## 544 **H2A.Z is required for reactivation of the cell cycle checkpoint targets**

545

546 We next analyzed the downstream targets that are inhibited by the checkpoint to  
547 prevent cell cycle progression while recombination and/or synapsis defects persist. In  
548 particular, we examined the production of various meiosis I-promoting factors: the Ndt80  
549 transcriptional inductor, the Clb1 cyclin and the Cdc5 polo-like kinase (Acosta *et al.* 2011). In  
550 addition, we also monitored the levels of the Swe1 kinase and its activity: the inhibitory  
551 phosphorylation of Cdc28 (CDK) at tyrosine 19 (Leu and Roeder 1999). In the wild type,  
552 after the recombination process is completed and the transient activation of Mek1 disappears,  
553 the program for meiosis I entry is turned on with the production of Ndt80, Clb1 and Cdc5, as  
554 well as the reduction of the inhibitory phosphorylation at Y19 of Cdc28 (Figure 4D). In the  
555 *zip1* mutant, the induction of Ndt80, Clb1 and Cdc5 were significantly delayed and high  
556 levels of the Swe1 kinase promoting Cdc28-Y19 phosphorylation persisted for as long as  
557 Mek1 was active. However, as Mek1 activation eventually declined, Ndt80 and Cdc5 were  
558 induced, and Swe1 and phospho-Cdc28-Y19 diminished, thus sustaining entry into meiosis I  
559 of at least a fraction of the cells (Figure 4A, 4D). In contrast, we found that although Mek1  
560 was down-regulated in *zip1 htz1* with similar kinetics to that in *zip1*, Ndt80, Clb1 and Cdc5  
561 production remained largely inhibited, and Swe1 and phospho-Cdc28-Y19 levels stayed high  
562 at late time points (Figure 4D), consistent with the inability of *zip1 htz1* cells to exit prophase  
563 I (Figure 4A). These results indicate that the main cell cycle targets of the checkpoint are  
564 misregulated in the absence of H2A.Z and suggest that this impairment is responsible for the  
565 strong block in meiotic progression of *zip1 htz1*.

566

## 567 **H2A.Z contribution to checkpoint recovery**

568

569 To determine whether H2A.Z is required to re-start meiotic cell cycle progression  
570 when the *zip1* defects that initially triggered the checkpoint are corrected we used a  
571 conditional system in which *ZIPI-GFP* expression is controlled by  $\beta$ -estradiol. *ZIPI-GFP*

572 was placed under control of the *GAL1* promoter in strains producing a version of the Gal4  
573 transcriptional regulator fused the  $\beta$ -estradiol receptor (Gal4[848].ER) (Benjamin *et al.* 2003;  
574 Voelkel-Meiman *et al.* 2012). As depicted in Figure 5A, meiotic cultures of both wild-type  
575 and *htz1* strains were initiated without  $\beta$ -estradiol; that is, in the absence of Zip1, to induce  
576 the checkpoint response. After 24 h, when the cells are blocked in prophase by the  
577 checkpoint,  $\beta$ -estradiol was added to half of the culture and the other half was maintained in  
578 the absence of the hormone as control. Recovery from the arrest after *ZIP1* induction was  
579 monitored at the cytological level (Zip1-GFP chromosome incorporation and DAPI staining  
580 of nuclei) and at the molecular level (western blot analysis of various checkpoint markers)  
581 (Figure 5B-5D).

582 In the absence of  $\beta$ -estradiol (“*ZIP1 OFF*”), the checkpoint was activated in the wild  
583 type as shown by the prominent H3-T11 and Hed1-T40 phosphorylation, but eventually the  
584 phosphorylation of these markers decreased concomitant with Ndt80 activation, Cdc5  
585 production and Cdc28-Y19 dephosphorylation (Figure 5D); thus sustaining meiotic  
586 progression (Figure 5C). Note that, for unknown reasons, the meiotic delay induced by the  
587 checkpoint in this “*ZIP1 OFF*” situation is less pronounced than in a *zip1* mutant (Figure 4A),  
588 perhaps due to a leaky, but undetectable, expression of *GAL1-ZIP1* even in the absence of  $\beta$ -  
589 estradiol. In the *htz1* mutant without  $\beta$ -estradiol, the checkpoint was also heavily activated  
590 but, albeit with a slightly slower kinetics, the levels of H3-T11 and Hed1-T40  
591 phosphorylation were also finally reduced. However, like in *zip1 htz1* mutants, Ndt80  
592 production was not induced and Cdc28-Y19 remained phosphorylated at late points (Figure  
593 5D); as a consequence, meiotic progression was robustly blocked (Figure 5C). Thus, this  
594 “*ZIP1 OFF*” situation phenocopies *ZIP1* deletion in *htz1* (Figure 4A-4D).

595 When  $\beta$ -estradiol was added, *ZIP1-GFP* expression was induced, and 3 h after  
596 hormone addition Zip1-containing chromosomes were detected in nuclei of both wild type  
597 and *htz1* (Figure 5B). *ZIP1-GFP* induction was slightly less efficient in the *htz1* mutant  
598 (Figure 5D), perhaps due to the effect of H2A.Z on *GAL1* promoter regulation (Santisteban *et*  
599 *al.* 2000). In the wild type, the checkpoint was rapidly turned off upon Zip1 production: Mek1  
600 signaling drastically disappeared, Ndt80 and Cdc5 were sharply induced and Cdc28-Y19  
601 phosphophorylation was erased (Figure 5D; “*ZIP1 ON*”). Consistently, prophase-arrested  
602 wild-type cells immediately underwent meiotic divisions after *ZIP1* expression (Figure 5C;  
603 “*ZIP1 ON*”). In the *htz1* mutant the checkpoint was also down-regulated upon *ZIP1* induction,  
604 but with a slower kinetics than that of the wild type. Consistently, a fraction of *htz1* cells

605 resumed meiotic divisions (Figure 5C, “*ZIP1 ON*”); thus, H2A.Z is not essential to re-start  
606 meiotic cell cycle progression when the defects that triggered the checkpoint are resolved, but  
607 contributes to an efficient recovery from the cell-cycle arrest.

608

### 609 ***NDT80* overexpression partially alleviates *zip1 htz1* meiotic arrest**

610

611 Since *zip1 htz1* shows a dramatic reduction in Ndt80 levels, and Cdc5 production is  
612 also impaired (Figure 4D), we examined whether an artificial increase in *CDC5* and *NDT80*  
613 expression could restore meiotic progression in *zip1 htz1*. As reported (Acosta *et al.* 2011),  
614 *CDC5* overexpression from a high-copy plasmid partially suppressed the meiotic delay of the  
615 *zip1* single mutant (Figure 6A); however, it had little effect on *zip1 htz1* (Figure 6B). In  
616 contrast, *NDT80* overexpression did promote more efficient meiotic progression in both *zip1*  
617 and *zip1 htz1* (Figure 6A-6B). These observations indicate that, in part, the strong meiotic  
618 block of *the zip1 htz1* mutant results from the drastic reduction in Ndt80 production and  
619 suggest that the relevant Ndt80-dependent event responsible for the arrest is not the inability  
620 to efficiently activate *CDC5* expression.

621

### 622 **Deletion of *SWE1*, but not mutation of Cdc28-Y19, suppresses the *zip1 htz1* meiotic** 623 **block**

624

625 We have found that the levels of both the Swe1 kinase and the phosphorylation of its  
626 target, Cdc28-Y19, remain high at late time points in the *zip1 htz1* meiotic cultures. To assess  
627 the relevance of Cdc28-Y19 inhibitory phosphorylation to impose the tight *zip1 htz1* meiotic  
628 arrest (Figure 7A), we generated three situations in which this phosphorylation event is either  
629 abolished or drastically reduced (Figure 7B): 1) *SWE1* deletion, 2) *cdc28-AF* mutation  
630 (carrying the threonine 18 and tyrosine 19 of Cdc28 changed to alanine and phenylalanine,  
631 respectively), and 3) overexpression of the *MIH1* gene from the prophase I-specific *HOP1*  
632 promoter in a high-copy plasmid (Figure S6A).

633 Remarkably, deletion of *SWE1* conferred a notable suppression of the *zip1 htz1*  
634 meiotic arrest (Figure 7C) although it did not reach wild-type kinetics; however, the  
635 elimination of Cdc28-Y19 phosphorylation by other means, such as Mih1 overproduction or  
636 *cdc28-AF* mutation had none or only a subtle effect on meiotic progression as most cells  
637 remained uninucleated (Figure 7C); only about 10% of *zip1 htz1 cdc28-AF* cells segregated  
638 their nuclei. In contrast, *MIH1* overexpression or *cdc28-AF* mutation did accelerate meiotic

639 progression in a *zip1* single mutant (Figure S6B). A kinase-dead *swe1-N584A* allele (Harvey  
640 *et al.* 2005) conferred the same suppression of the checkpoint meiotic arrest as the *SWE1*  
641 deletion both in *zip1* and *zip1 htz1* strains (Figure S6C), ruling out the possibility of a direct  
642 inhibitory effect exerted by the physical interaction of Swe1 with CDK independent of Tyr19  
643 phosphorylation. Thus, these results strongly suggest that the Swe1 kinase must impact an  
644 additional mechanism, independent of CDK phosphorylation, which is particularly relevant in  
645 the absence of H2A.Z to maintain the *zip1*-induced checkpoint arrest.

646

### 647 ***CLB1* overexpression restores meiotic progression in *zip1 htz1 cdc28-AF***

648

649 To further explore the checkpoint response in *zip1 htz1* and the effect of CDK  
650 phosphorylation we analyzed by western blot various molecular markers in the *swe1* and  
651 *cdc28-AF* mutants. According with its meiotic progression (Figure 7C), the checkpoint was  
652 deactivated in *zip1 htz1 swe1*, as manifested by the disappearance of phospho-Hop1-T318 and  
653 phospho-Hed1-T40. Concurrently, the meiosis I-promoting factors Ndt80, Clb1 and Cdc5  
654 were produced, albeit with slower kinetics than in the wild type (Figure 7D).

655 Like in *zip1 htz1*, upstream checkpoint signals were also down-regulated in *zip1 htz1*  
656 *cdc28-AF*; in contrast, Ndt80, Clb1 and Cdc5 accumulated at higher levels at later time points  
657 in this mutant (Figure 7D and Figure S6D). The presence of meiosis I-promoting factors  
658 suggests that the *zip1 htz1 cdc28-AF* triple mutant is proficient to undergo the prophase to  
659 meiosis I transition, but does not efficiently complete chromosome segregation. Indeed, about  
660 40% of *zip1 htz1 cdc28-AF* cells assembled meiotic spindles at late time points (Figure 7E)  
661 despite their marked impairment to undergo meiotic divisions (Figure 7C).

662 Notably, *CLB1* overexpression from a high-copy plasmid restored substantial meiotic  
663 progression in *zip1 htz1 cdc28-AF* phenocopying *zip1 htz1 swe1* (Figure 7C-7D). In sum,  
664 these observations suggest that, in addition to phosphorylate Cdc28 at tyrosine 19 to prevent  
665 exit from prophase I, Swe1 regulates timing and/or abundance of Clb1 production to restrain  
666 meiotic progression in *zip1 htz1* at a later stage in meiotic development.

667

## 668 **Discussion**

669

670 The H2A.Z histone variant is a ubiquitous determinant of chromatin structure playing  
671 crucial roles in genome stability and gene expression in mitotically dividing eukaryotic cells.



672 However, only a limited number of studies in a few model organisms have addressed the  
673 relevance of H2A.Z in meiosis, often using indirect approaches. In this article, we have  
674 focused on the direct functional contribution of H2A.Z during meiosis in the budding yeast *S.*  
675 *cerevisiae*, a widely used model system for meiotic studies.

676

## 677 **H2A.Z is required for proper meiotic development**

678

679 We report here that the *htz1* mutant of *S. cerevisiae* lacking the H2A.Z histone  
680 completes the meiotic program albeit less efficiently than the wild type. The *htz1* mutant  
681 shows delayed entry into meiosis, impaired sporulation and reduced spore viability indicating  
682 that H2A.Z is required to sustain accurate meiosis. The persistence of recombination  
683 intermediates or incomplete synapsis triggers the so-called pachytene checkpoint or meiotic  
684 recombination checkpoint (MRC) that delays meiotic progression. We found that checkpoint  
685 elimination by deleting *MEK1* or abolishing DSB formation by deleting *SPO11* do not restore  
686 normal levels of meiotic nuclear divisions in *htz1* indicating that the faulty events resulting in  
687 impaired completion of meiotic development are not sensed by the MRC and likely do not  
688 involve recombination.

689 In fission yeast, H2A.Z participates in the initiation of meiotic recombination by  
690 promoting the association of Spo11 and accessory proteins to chromatin (Yamada *et al.*  
691 2018). We have found a modest reduction in the number of Rad51 foci in *zip1 htz1* compared  
692 to *zip1* (Figure 4C) that could be compatible with reduced number of initiating DSBs,  
693 although a slightly defective loading of Rad51 to DSBs in the absence of H2A.Z or a delayed  
694 onset of DSB formation cannot be ruled out. A possible role for H2A.Z in DSB generation  
695 could be also inferred from the presence of H2A.Z at promoters (at least in vegetative cells)  
696 (Raisner *et al.* 2005) where most DSBs occur in *S. cerevisiae* (Pan *et al.* 2011). However, our  
697 results suggest that, in budding yeast, the functional contribution of H2A.Z to DSB formation,  
698 if any, is only minor: 1) dynamics of Hop1 phosphorylation at T318, which serves as an  
699 indirect reporter for meiotic DSBs, is similar in wild type and *htz1*. 2) A reduction in DSB  
700 formation provoked by the absence of H2A.Z would result in a less stringent checkpoint  
701 response; however the *zip1 htz1* double mutant displays a more robust checkpoint arrest  
702 compared to *zip1*. 3) Crossover recombination in a particular interval of chromosome VIII is  
703 not significantly affected by *htz1*. It is formally possible that recombination could be altered  
704 in other chromosomal regions and/or that CO homeostasis could compensate for a reduced  
705 number of initiating events (Martini *et al.* 2006), but this would imply at best a subsidiary



706 function for H2A.Z in DSB formation. In sum, we do not favor the scenario in which the  
707 meiotic phenotypes of the *htz1* mutant could be solely explained by impaired DSB formation.  
708 Our genome-wide study of meiotic gene expression in the *htz1* mutant reveals that many  
709 down-regulated genes cluster in several functional categories related to mitotic and meiotic  
710 cell cycle and chromosome segregation events (Table 1 and Table S4). We propose that, in  
711 unperturbed conditions, H2A.Z is not essential to perform any critical meiotic event, but the  
712 massive transcription misregulation that occurs in the absence of this histone variant may  
713 impact on various processes resulting in a less accurate and efficient completion of the  
714 meiotic program.

715

### 716 **H2A.Z is essential to resume meiotic progression in the absence of Zip1**

717

718 Certain chromatin modifications are crucial for checkpoint activity. Dot1-mediated  
719 trimethylation of H3K79 controls Pch2 chromosomal distribution and sustains Hop1  
720 phosphorylation and the ensuing Mek1 activation in *zip1* mutants. As a consequence, deletion  
721 of *DOT1* or mutation of H3K79 suppresses the meiotic arrest/delay of *zip1* (San-Segundo and  
722 Roeder 2000; Ontoso *et al.* 2013). The Sir2 histone deacetylase is also essential for the *zip1*-  
723 induced MRC. One of the main targets of Sir2 is acetylated H4K16. In *zip1 sir2* mutants, as  
724 well as in *zip1 H4-K16Q* mutants (mimicking constitutive H4K16 acetylation), the *zip1* block  
725 is bypassed (San-Segundo and Roeder 1999; Cavero *et al.* 2016). At least in vegetative cells,  
726 Dot1 and the SIR complex collaborate with H2A.Z in delimiting the boundaries between  
727 euchromatin and telomeric heterochromatin (Dhillon and Kamakaka 2000; Meneghini *et al.*  
728 2003). However, these chromatin modifications perform opposite functions in the MRC;  
729 while in *zip1 dot1* and *zip1 sir2* the meiotic delay is suppressed, *zip1 htz1* shows a stronger  
730 meiotic arrest. Our results imply that, in contrast to Dot1 and Sir2, H2A.Z is not required for  
731 checkpoint activation, but it is involved in regulation meiotic progression at least in a *zip1*  
732 mutant.

733 We show that the *zip1* mutant exhibits a pronounced meiotic delay, but eventually,  
734 checkpoint signaling declines, as manifested by the drop in Hop1 phosphorylation and in  
735 Mek1 activation at late time points, and at least a fraction of the culture resumes meiotic  
736 progression and completes sporulation. In principle, checkpoint deactivation and resumption  
737 of cell cycle progression can occur by two related but conceptually different phenomena:  
738 ‘checkpoint adaptation’ and ‘checkpoint recovery’. Adaptation takes place when, despite the  
739 persistence of the defects that initially triggered the checkpoint, its activity declines after a

740 prolonged period and the cell cycle resumes without previous elimination of the damage. This  
741 process of adaptation has been extensively documented in vegetative budding yeast  
742 responding to the presence of an irreparable DSB (Pellicoli *et al.* 2001). In contrast,  
743 checkpoint recovery involves the disappearance or repair of the initial problems that  
744 stimulated the checkpoint, resulting in decreased signaling and cell cycle progression.

745 Previous studies suggest that the eventual checkpoint deactivation and recovery of  
746 meiotic progression in *zip1* is consequence of the disappearance of the initial defects (likely  
747 unrepaired DSBs) presumably by using the sister chromatid instead of the homolog as  
748 template for DNA repair. This is based on the observation that deletion of *RAD51*, which  
749 fundamentally compromises sister chromatid recombination (Liu *et al.* 2014; Callender *et al.*  
750 2016), leads to a permanent arrest in *zip1* (Herruzo *et al.* 2016) (Figure S7A). In this work we  
751 report that, like *zip1 rad51*, the *zip1 htz1* double mutant also shows a tight meiotic block;  
752 however, the analysis of various checkpoint markers reveals that the cause of the arrest is  
753 different in *zip1 rad51* and *zip1 htz1*. In the *zip1 rad51* mutant, high levels of Hop1-T318  
754 phosphorylation and Mek1 activity persist until late time points, consistent with the  
755 accumulation of unrepaired recombination intermediates that signal to the checkpoint.  
756 Consequently, Cdc28-Ty19 phosphorylation remains high and Cdc5 production is inhibited,  
757 thus explaining the meiotic arrest (Herruzo *et al.* 2016) (Figure S7B). In contrast, we show  
758 here that in *zip1 htz1*, Hop1 and Mek1 activation eventually decline with similar kinetics to  
759 that observed in the *zip1* single mutant, although meiosis I promoting factors (i.e., Ndt80,  
760 Cdc28, Cdc5, Clb1) remain largely inhibited. These observations imply that the  
761 disappearance of the initial signal stimulating the checkpoint is not impacted by *htz1*, placing  
762 H2A.Z function downstream in the pathway.

763

#### 764 **Influence of H2A.Z on Ndt80 and CDK activity**

765

766 In our molecular analysis of the *zip1*-induced MRC pathway at various levels, the  
767 main alterations detected resulting from the absence of H2A.Z were the dramatic reduction in  
768 Ndt80 levels and the persistence of both the Swe1 kinase and phosphorylation of its substrate  
769 Cdc18-Y19. The observation that *NDT80* overexpression partially suppresses the *zip1 htz1*  
770 arrest raises the possibility that H2A.Z could be directly or indirectly controlling *NDT80* gene  
771 expression. It has been recently described that Bdf1, a subunit of the SWR1 complex involved  
772 in the interaction with certain histone marks at particular nucleosomes (Altaf *et al.* 2010), is  
773 required for meiotic progression and sporulation. Bdf1 binds to the *NDT80* promoter through

774 the BD1 and BD2 bromodomains promoting its transcription (Garcia-Oliver *et al.* 2017).  
775 Nevertheless, several observations suggest that H2A.Z does not control Ndt80 levels via  
776 Bdf1. The interaction of Bdf1 with the *NDT80* promoter is independent of the SWR1 complex  
777 (Garcia-Oliver *et al.* 2017), consistent with our observation that meiotic progression is not  
778 significantly affected in the *swr1* single mutant (Figure S2A-S2B). However, the meiotic  
779 checkpoint function of H2A.Z does depend on SWR1 since both *zip1 htz1* and *zip1 swr1*  
780 show meiotic arrest (Figure S4D). In addition, strong *BDF1* overexpression does not promote  
781 sporulation in *zip1 htz1* (Figure S8A). Moreover, we did not find a significant change in  
782 *NDT80* transcript levels in our genome-wide expression analysis of the *htz1* mutant during  
783 meiosis. Regulation of *NDT80* expression is quite complex and also involves the elimination  
784 of the Sum1 repressor binding to the middle-sporulation elements (MSE) in its promoter. The  
785 displacement of Sum1 from the MSE requires the competition with Ndt80 and also the  
786 phosphorylation of Sum1 by Ime2 and CDK (Winter 2012). We found that, like *zip1 htz1*, the  
787 *zip1 htz1 sum1* triple mutant remains blocked in meiosis (Figure S8B) indicating that H2A.Z  
788 does not exert its effect on Ndt80 levels via Sum1. In addition, activation of Ndt80 requires  
789 its phosphorylation in the nucleus; stimulation of the MRC results in cytoplasmic  
790 sequestration of Ndt80 (Wang *et al.* 2011). It is tempting to speculate that H2A.Z could be  
791 involved, directly or indirectly, in the nuclear import of Ndt80 when the signal stimulating the  
792 checkpoint by the absence of Zip1 declines. The contribution of H2A.Z to the nuclear  
793 transport of other proteins has been reported in yeast (Gardner *et al.* 2011), but the almost  
794 undetectable levels of Ndt80 in *zip1 htz1* complicate this analysis with the tools currently  
795 available.

796 Our results also show that, in *zip1 htz1*, Swe1-dependent inhibitory phosphorylation of  
797 Cdc28-Y19 persists longer than in *zip1*, suggesting that H2A.Z action may be impinging on  
798 CDK activity. In fact, deletion of *SWE1*, which abolishes Cdc28-Y19 phosphorylation,  
799 significantly suppresses *zip1 htz1* arrest. Since *MIH1*, the gene encoding the phosphatase that  
800 reverts Cdc28-Y19 phosphorylation, was found among the genes whose meiotic expression  
801 decreases in the *htz1* mutant (Table 1), it is plausible to postulate that lower levels of the  
802 Mih1 phosphatase in *zip1 htz1* could explain the accumulation of phosphorylated Cdc28-Y19  
803 and the impaired meiotic progression. However, we demonstrate that strong overproduction  
804 of Mih1, which results in negligible Cdc28-Y19 levels, does not restore meiotic nuclear  
805 divisions in *zip1 htz1*. This observation, together with the fact that a non-phosphorylatable  
806 *cdc28-AF* mutant also has a minimal impact on the kinetics of meiotic progression of *zip1*

807 *htz1*, strongly suggest that Swe1 must possess another target in addition to CDK to restrain  
808 meiosis in *zip1 htz1*.

809 Besides CDK, only a limited number of substrates for Swe1/Wee1 have been  
810 described. One attractive candidate is Y40 of histone H2B, which is phosphorylated by Swe1  
811 in yeast (or H2B-Y37 phosphorylated by Wee1 in mammals) to control transcription of  
812 histone genes (Mahajan *et al.* 2012). H2A.Z interacts with H2B in the nucleosomes; therefore,  
813 it is formally possible that the conformational change induced by SWR1-dependent  
814 substitution of histone H2A by H2A.Z could modulate the phosphorylation of H2B-Y40 by  
815 Swe1. To explore if this chromatin modification has an impact on the MRC, we have  
816 generated and analyzed a non-phosphorylatable *htb1-Y40F* mutant and found that the *zip1*  
817 *htz1 htb2Δ htb1-Y40F* mutant displays the same meiotic arrest as *zip1 htz1* (Figure S8C),  
818 indicating that this additional Swe1 target is not relevant for the checkpoint response.

819 It is surprising that in the *zip1 htz1 cdc28-AF* mutant we observe the induction and  
820 accumulation of the proteins involved in meiosis I entry, such as Ndt80, Clb1 and Cdc5, but  
821 most cells remain uninucleated (Figure 7). This situation (i.e., accumulation of Ndt80, Cdc5  
822 and Clb1) is reminiscent of the metaphase I arrest induced by a meiotic-depletion *P<sub>CLB2</sub>-cdc20*  
823 mutant (Okaz *et al.* 2012) and suggest that, at least some, *zip1 htz1 cdc28-AF* cells are  
824 capable of exiting prophase and may arrest at a later stage, such as the metaphase to anaphase  
825 I transition. Remarkably, *CLB1* overexpression in *zip1 htz1 cdc28-AF* allows completion of  
826 meiotic divisions to a similar degree as does the *zip1 htz1 swe1* mutant. This observation is  
827 consistent with the notion that, in the absence of CDK inhibitory phosphorylation (i.e., *cdc28-*  
828 *AF*), Swe1 negatively controls *CLB1* levels in *zip1 htz1* likely by inhibiting a *CLB1-*  
829 promoting factor. We note that overexpression of *CLB1* from a high-copy plasmid not only  
830 increases the global amount of Clb1, but also accelerates its production being detected at  
831 earlier time points in the meiotic kinetics. Execution of proper prophase to meiosis I transition  
832 is under tight temporal control by a number of events including the sequential degradation  
833 and accumulation of mitotic and meiotic factors, respectively (Okaz *et al.* 2012). We show  
834 that *CLB1* overexpression in *zip1 htz1 cdc28-AF* partially restores the proper scenario for  
835 timely execution of meiotic transitions. Clb1 is phosphorylated in a CDK- and Cdc5-  
836 dependent manner and it is imported to the nucleus by a mechanism that depends on CDK,  
837 but not Cdc5 activity. Although Clb1 nuclear localization is not essential for meiotic nuclear  
838 divisions it contributes to efficient meiosis I exit (Tibbles *et al.* 2013). On the other hand, the  
839 biological relevance of Clb1 phosphorylation remains to be established, but it correlates with  
840 the induction of Cdc5. What is the identity of the *CLB1*-promoting factor negatively

841 controlled by Swe1? We speculate that Swe1 could be acting, directly or indirectly, on Ndt80  
842 to inhibit its activity especially in the absence of H2A.Z. We propose a model in which Swe1  
843 action could impact both CDK and Ndt80 activity to restrain meiotic progression (Figure 8A).  
844 A cross-talk between CDK and Ndt80 activation in checkpoint-inducing conditions has been  
845 also documented (Acosta *et al.* 2011). This model would explain the following situations. 1)  
846 In the *zip1 htz1* mutant overexpressing *NDT80*, exogenous levels of this transcription factor  
847 could partially overcome Swe1 inhibitory effect on Ndt80, resulting only in a partial release  
848 of the meiotic arrest (Figure 6) because Swe1-dependent Cdc28-Y19 phosphorylation would  
849 persist (Figure 8B). 2) In the *zip1 htz1 cdc28-AF*, the inhibition of CDK by Swe1 is released  
850 because the phosphorylation target is mutated, but the timing of Clb1 induction is incorrect  
851 due the opposite effect of CDK and Swe1 on Ndt80 preventing proper meiotic progression  
852 (Figure 8C). 3) In the *zip1 htz1 swe1*, both inhibitions on CDK and Ndt80 disappear  
853 sustaining meiotic progression (Figure 8D).

854 In summary, the detailed analysis of the MRC in the *zip1 htz1* allowed us to discover  
855 novel functional interactions between the downstream components of the pathway driving  
856 meiotic cell cycle progression. Why these aspects are particularly manifested in the absence  
857 of H2A.Z? We show here that a number of genes involved in different cell cycle events are  
858 misregulated in the *htz1* mutants. A feasible explanation is that the unbalanced levels in cell  
859 cycle regulators creates more stringent conditions in *zip1 htz1* for meiosis I entry in  
860 comparison with *zip1*, thus revealing more subtle aspects of the molecular mechanisms  
861 regulating the prophase to meiosis I transition when the MRC has been deactivated.  
862 Additional work will be required to pinpoint the relevant factors targeted by H2A.Z.

863

864

## 865 **Acknowledgements**

866

867 We thank Shirleen Roeder, Jacqueline Segall, Nancy Hollingsworth, Scott Keeney, Michael  
868 Lichten, Amy Macqueen, Jesús Carballo, Raimundo Freire and Marisol Santisteban for  
869 providing plasmids, strains and/or antibodies. We are also grateful to Irene Gil-Torres and  
870 David Núñez for help in strain construction and analysis, to Isabel Acosta for technical  
871 assistance and to Andrés Clemente-Blanco and José Pérez-Martín for valuable discussion and  
872 suggestions. This work was funded by grants BFU2015-63698-P (to FP), BFU2015-65417-R  
873 (to PSS), and BFU2015-69142-REDT (to FP and PSS) from the Ministry of Economy and

874 Competitiveness of Spain (MINECO), and grant CSI084U16 from Junta de Castilla y León  
875 (Spain), to PSS.

876

877

878

## 879 **Literature cited**

880

881 Acosta, I., D. Ontoso and P. A. San-Segundo, 2011 The budding yeast polo-like kinase Cdc5  
882 regulates the Ndt80 branch of the meiotic recombination checkpoint pathway. *Mol.*  
883 *Biol. Cell* 22: 3478-3490.

884 Adkins, N. L., H. Niu, P. Sung and C. L. Peterson, 2013 Nucleosome dynamics regulates  
885 DNA processing. *Nat. Struct. Mol. Biol.* 20: 836-842.

886 Altaf, M., A. Auger, J. Monnet-Saksouk, J. Brodeur, S. Piquet *et al.*, 2010 NuA4-dependent  
887 acetylation of nucleosomal histones H4 and H2A directly stimulates incorporation of  
888 H2A.Z by the SWR1 complex. *J. Biol. Chem.* 285: 15966-15977.

889 Argunhan, B., W. K. Leung, N. Afshar, Y. Terentyev, V. V. Subramanian *et al.*, 2017  
890 Fundamental cell cycle kinases collaborate to ensure timely destruction of the  
891 synaptonemal complex during meiosis. *EMBO J.* 36: 2488-2509.

892 Benjamin, K. R., C. Zhang, K. M. Shokat and I. Herskowitz, 2003 Control of landmark events  
893 in meiosis by the CDK Cdc28 and the meiosis-specific kinase Ime2. *Genes Dev.* 17:  
894 1524-1539.

895 Billon, P., and J. Cote, 2013 Precise deposition of histone H2A.Z in chromatin for genome  
896 expression and maintenance. *Biochim. Biophys. Acta* 1819: 290-302.

897 Bishop, D. K., D. Park, L. Xu and N. Kleckner, 1992 DMC1: a meiosis-specific yeast  
898 homolog of *E. coli* recA required for recombination, synaptonemal complex  
899 formation, and cell cycle progression. *Cell* 69: 439-456.

900 Borner, G. V., N. Kleckner and N. Hunter, 2004 Crossover/noncrossover differentiation,  
901 synaptonemal complex formation, and regulatory surveillance at the  
902 leptotene/zygotene transition of meiosis. *Cell* 117: 29-45.

903 Brachet, E., V. Sommermeyer and V. Borde, 2012 Interplay between modifications of  
904 chromatin and meiotic recombination hotspots. *Biol. Cell* 104: 51-69.

905 Callender, T. L., R. Laureau, L. Wan, X. Chen, R. Sandhu *et al.*, 2016 Mek1 Down Regulates  
906 Rad51 Activity during Yeast Meiosis by Phosphorylation of Hed1. *PLoS Genet.* 12:  
907 e1006226.

908 Carballo, J. A., A. L. Johnson, S. G. Sedgwick and R. S. Cha, 2008 Phosphorylation of the  
909 axial element protein Hop1 by Mec1/Tel1 ensures meiotic interhomolog  
910 recombination. *Cell* 132: 758-770.

911 Cavero, S., E. Herruzo, D. Ontoso and P. A. San-Segundo, 2016 Impact of histone H4K16  
912 acetylation on the meiotic recombination checkpoint in *Saccharomyces cerevisiae*.  
913 *Microb. Cell* 3: 606-620.

914 Chen, X., R. T. Suhandynata, R. Sandhu, B. Rockmill, N. Mohibullah *et al.*, 2015  
915 Phosphorylation of the Synaptonemal Complex Protein Zip1 Regulates the  
916 Crossover/Noncrossover Decision during Yeast Meiosis. *PLoS Biol.* 13: e1002329.

917 Choi, K., X. Zhao, K. A. Kelly, O. Venn, J. D. Higgins *et al.*, 2013 Arabidopsis meiotic  
918 crossover hot spots overlap with H2A.Z nucleosomes at gene promoters. *Nat. Genet.*  
919 45: 1327-1336.



- 920 Chu, S., J. DeRisi, M. Eisen, J. Mulholland, D. Botstein *et al.*, 1998 The transcriptional  
921 program of sporulation in budding yeast. *Science* 282: 699-705.
- 922 Chuang, C. N., Y. H. Cheng and T. F. Wang, 2012 Mek1 stabilizes Hop1-Thr318  
923 phosphorylation to promote interhomolog recombination and checkpoint responses  
924 during yeast meiosis. *Nucleic Acids Res.* 40: 11416-11427.
- 925 Dhillon, N., and R. T. Kamakaka, 2000 A histone variant, Htz1p, and a Sir1p-like protein,  
926 Esc2p, mediate silencing at HMR. *Mol. Cell* 6: 769-780.
- 927 Dong, H., and G. S. Roeder, 2000 Organization of the yeast Zip1 protein within the central  
928 region of the synaptonemal complex. *J. Cell Biol.* 148: 417-426.
- 929 Garcia-Oliver, E., C. Ramus, J. Perot, M. Arlotto, M. Champleboux *et al.*, 2017 Bdf1  
930 Bromodomains Are Essential for Meiosis and the Expression of Meiotic-Specific  
931 Genes. *PLoS Genet.* 13: e1006541.
- 932 Gardner, J. M., C. J. Smoyer, E. S. Stensrud, R. Alexander, M. Gogol *et al.*, 2011 Targeting  
933 of the SUN protein Mps3 to the inner nuclear membrane by the histone variant  
934 H2A.Z. *J. Cell Biol.* 193: 489-507.
- 935 Goldstein, A. L., and J. H. McCusker, 1999 Three new dominant drug resistance cassettes for  
936 gene disruption in *Saccharomyces cerevisiae*. *Yeast* 15: 1541-1553.
- 937 Greaves, I. K., D. Rangasamy, M. Devoy, J. A. Marshall Graves and D. J. Tremethick, 2006  
938 The X and Y chromosomes assemble into H2A.Z-containing facultative  
939 heterochromatin following meiosis. *Mol. Cell Biol.* 26: 5394-5405.
- 940 Harvey, S. L., A. Charlet, W. Haas, S. P. Gygi and D. R. Kellogg, 2005 Cdk1-dependent  
941 regulation of the mitotic inhibitor Wee1. *Cell* 122: 407-420.
- 942 Herruzo, E., D. Ontoso, S. Gonzalez-Arranz, S. Caverio, A. Lechuga *et al.*, 2016 The Pch2  
943 AAA+ ATPase promotes phosphorylation of the Hop1 meiotic checkpoint adaptor in  
944 response to synaptonemal complex defects. *Nucleic Acids Res.* 44: 7722-7741.
- 945 Horigome, C., Y. Oma, T. Konishi, R. Schmid, I. Marcomini *et al.*, 2014 SWR1 and INO80  
946 chromatin remodelers contribute to DNA double-strand break perinuclear anchorage  
947 site choice. *Mol. Cell* 55: 626-639.
- 948 Huang, D. W., B. T. Sherman, Q. Tan, J. Kir, D. Liu *et al.*, 2007 DAVID Bioinformatics  
949 Resources: expanded annotation database and novel algorithms to better extract  
950 biology from large gene lists. *Nucleic Acids Res.* 35: W169-175.
- 951 Hunter, N., 2015 Meiotic Recombination: The Essence of Heredity. Cold Spring Harb.  
952 Perspect. Biol. 7.
- 953 Joshi, N., M. S. Brown, D. K. Bishop and G. V. Borner, 2015 Gradual implementation of the  
954 meiotic recombination program via checkpoint pathways controlled by global DSB  
955 levels. *Mol. Cell* 57: 797-811.
- 956 Kalocsay, M., N. J. Hiller and S. Jentsch, 2009 Chromosome-wide Rad51 spreading and  
957 SUMO-H2A.Z-dependent chromosome fixation in response to a persistent DNA  
958 double-strand break. *Mol. Cell* 33: 335-343.
- 959 Keeney, S., C. N. Giroux and N. Kleckner, 1997 Meiosis-specific DNA double-strand breaks  
960 are catalyzed by Spo11, a member of a widely conserved protein family. *Cell* 88: 375-  
961 384.
- 962 Keeney, S., J. Lange and N. Mohibullah, 2014 Self-organization of meiotic recombination  
963 initiation: general principles and molecular pathways. *Annu. Rev. Genet.* 48: 187-214.
- 964 Kniewel, R., H. Murakami, Y. Liu, M. Ito, K. Ohta *et al.*, 2017 Histone H3 Threonine 11  
965 Phosphorylation Is Catalyzed Directly by the Meiosis-Specific Kinase Mek1 and  
966 Provides a Molecular Readout of Mek1 Activity in Vivo. *Genetics* 207: 1313-1333.
- 967 Kobor, M. S., S. Venkatasubrahmanyam, M. D. Meneghini, J. W. Gin, J. L. Jennings *et al.*,  
968 2004 A protein complex containing the conserved Swi2/Snf2-related ATPase Swr1p  
969 deposits histone variant H2A.Z into euchromatin. *PLoS Biol.* 2: E131.



- 970 Krogan, N. J., M. C. Keogh, N. Datta, C. Sawa, O. W. Ryan *et al.*, 2003 A Snf2 family  
971 ATPase complex required for recruitment of the histone H2A variant Htz1. *Mol. Cell*  
972 12: 1565-1576.
- 973 Leu, J. Y., and G. S. Roeder, 1999 The pachytene checkpoint in *S. cerevisiae* depends on  
974 Swe1-mediated phosphorylation of the cyclin-dependent kinase Cdc28. *Mol. Cell* 4:  
975 805-814.
- 976 Liu, Y., W. A. Gaines, T. Callender, V. Busygina, A. Oke *et al.*, 2014 Down-regulation of  
977 Rad51 activity during meiosis in yeast prevents competition with Dmc1 for repair of  
978 double-strand breaks. *PLoS Genet.* 10: e1004005.
- 979 Longtine, M. S., A. McKenzie, 3rd, D. J. Demarini, N. G. Shah, A. Wach *et al.*, 1998  
980 Additional modules for versatile and economical PCR-based gene deletion and  
981 modification in *Saccharomyces cerevisiae*. *Yeast* 14: 953-961.
- 982 MacQueen, A. J., and A. Hochwagen, 2011 Checkpoint mechanisms: the puppet masters of  
983 meiotic prophase. *Trends Cell Biol.* 21: 393-400.
- 984 Mahajan, K., B. Fang, J. M. Koomen and N. P. Mahajan, 2012 H2B Tyr37 phosphorylation  
985 suppresses expression of replication-dependent core histone genes. *Nat. Struct. Mol.*  
986 *Biol.* 19: 930-937.
- 987 Martini, E., R. L. Diaz, N. Hunter and S. Keeney, 2006 Crossover homeostasis in yeast  
988 meiosis. *Cell* 126: 285-295.
- 989 Meneghini, M. D., M. Wu and H. D. Madhani, 2003 Conserved histone variant H2A.Z  
990 protects euchromatin from the ectopic spread of silent heterochromatin. *Cell* 112: 725-  
991 736.
- 992 Mizuguchi, G., X. Shen, J. Landry, W. H. Wu, S. Sen *et al.*, 2004 ATP-driven exchange of  
993 histone H2AZ variant catalyzed by SWR1 chromatin remodeling complex. *Science*  
994 303: 343-348.
- 995 Morillo-Huesca, M., M. Clemente-Ruiz, E. Andujar and F. Prado, 2010 The SWR1 histone  
996 replacement complex causes genetic instability and genome-wide transcription  
997 misregulation in the absence of H2A.Z. *PLoS One* 5: e12143.
- 998 Niu, H., L. Wan, B. Baumgartner, D. Schaefer, J. Loidl *et al.*, 2005 Partner choice during  
999 meiosis is regulated by Hop1-promoted dimerization of Mek1. *Mol. Biol. Cell* 16:  
1000 5804-5818.
- 1001 Niu, H., L. Wan, V. Busygina, Y. Kwon, J. A. Allen *et al.*, 2009 Regulation of meiotic  
1002 recombination via Mek1-mediated Rad54 phosphorylation. *Mol. Cell* 36: 393-404.
- 1003 Okaz, E., O. Arguello-Miranda, A. Bogdanova, P. K. Vinod, J. J. Lipp *et al.*, 2012 Meiotic  
1004 prophase requires proteolysis of M phase regulators mediated by the meiosis-specific  
1005 APC/C<sup>Ama1</sup>. *Cell* 151: 603-618.
- 1006 Ontoso, D., I. Acosta, F. van Leeuwen, R. Freire and P. A. San-Segundo, 2013 Dot1-  
1007 dependent histone H3K79 methylation promotes activation of the Mek1 meiotic  
1008 checkpoint effector kinase by regulating the Hop1 adaptor. *PLoS Genet.* 9: e1003262.
- 1009 Ontoso, D., L. Kauppi, S. Keeney and P. A. San-Segundo, 2014 Dynamics of DOT1L  
1010 localization and H3K79 methylation during meiotic prophase I in mouse  
1011 spermatocytes. *Chromosoma* 123: 147-164.
- 1012 Pak, J., and J. Segall, 2002 Regulation of the premiddle and middle phases of expression of  
1013 the NDT80 gene during sporulation of *Saccharomyces cerevisiae*. *Mol. Cell. Biol.* 22:  
1014 6417-6429.
- 1015 Pan, J., M. Sasaki, R. Kniewel, H. Murakami, H. G. Blitzblau *et al.*, 2011 A hierarchical  
1016 combination of factors shapes the genome-wide topography of yeast meiotic  
1017 recombination initiation. *Cell* 144: 719-731.

- 1018 Pelliccioli, A., S. E. Lee, C. Lucca, M. Foiani and J. E. Haber, 2001 Regulation of  
1019 *Saccharomyces* Rad53 checkpoint kinase during adaptation from DNA damage-  
1020 induced G2/M arrest. *Mol. Cell* 7: 293-300.
- 1021 Penedos, A., A. L. Johnson, E. Strong, A. S. Goldman, J. A. Carballo *et al.*, 2015 Essential  
1022 and Checkpoint Functions of Budding Yeast ATM and ATR during Meiotic Prophase  
1023 Are Facilitated by Differential Phosphorylation of a Meiotic Adaptor Protein, Hop1.  
1024 *PLoS One* 10: e0134297.
- 1025 Prugar, E., C. Burnett, X. Chen and N. M. Hollingsworth, 2017 Coordination of Double  
1026 Strand Break Repair and Meiotic Progression in Yeast by a Mek1-Ndt80 Negative  
1027 Feedback Loop. *Genetics* 206: 497-512.
- 1028 Qin, Y., L. Zhao, M. I. Skaggs, S. Andreuzza, T. Tsukamoto *et al.*, 2014 ACTIN-RELATED  
1029 PROTEIN6 Regulates Female Meiosis by Modulating Meiotic Gene Expression in  
1030 *Arabidopsis*. *Plant Cell* 26: 1612-1628.
- 1031 Raisner, R. M., P. D. Hartley, M. D. Meneghini, M. Z. Bao, C. L. Liu *et al.*, 2005 Histone  
1032 variant H2A.Z marks the 5' ends of both active and inactive genes in euchromatin.  
1033 *Cell* 123: 233-248.
- 1034 Refolio, E., S. Cavero, E. Marcon, R. Freire and P. A. San-Segundo, 2011 The Ddc2/ATRIP  
1035 checkpoint protein monitors meiotic recombination intermediates *J. Cell Sci.* 124:  
1036 2488-2500.
- 1037 Rockmill, B., 2009 Chromosome spreading and immunofluorescence methods in  
1038 *Saccharomyces cerevisiae*. *Methods Mol. Biol.* 558: 3-13.
- 1039 Rockmill, B., and G. S. Roeder, 1990 Meiosis in asynaptic yeast. *Genetics* 126: 563-574.
- 1040 San-Segundo, P. A., and G. S. Roeder, 1999 Pch2 links chromatin silencing to meiotic  
1041 checkpoint control. *Cell* 97: 313-324.
- 1042 San-Segundo, P. A., and G. S. Roeder, 2000 Role for the silencing protein Dot1 in meiotic  
1043 checkpoint control. *Mol. Biol. Cell* 11: 3601-3615.
- 1044 Santisteban, M. S., T. Kalashnikova and M. M. Smith, 2000 Histone H2A.Z regulates  
1045 transcription and is partially redundant with nucleosome remodeling complexes. *Cell*  
1046 103: 411-422.
- 1047 Sheff, M. A., and K. S. Thorn, 2004 Optimized cassettes for fluorescent protein tagging in  
1048 *Saccharomyces cerevisiae*. *Yeast* 21: 661-670.
- 1049 Sourirajan, A., and M. Lichten, 2008 Polo-like kinase Cdc5 drives exit from pachytene during  
1050 budding yeast meiosis. *Genes Dev.* 22: 2627-2632.
- 1051 Stuckey, S., K. Mukherjee and F. Storici, 2011 In vivo site-specific mutagenesis and gene  
1052 collage using the delitto perfetto system in yeast *Saccharomyces cerevisiae*. *Methods*  
1053 *Mol. Biol.* 745: 173-191.
- 1054 Subramanian, V. V., and A. Hochwagen, 2014 The Meiotic Checkpoint Network: Step-by-  
1055 Step through Meiotic Prophase. *Cold Spring Harb. Perspect. Biol.* 6.
- 1056 Subramanian, V. V., A. J. MacQueen, G. Vader, M. Shinohara, A. Sanchez *et al.*, 2016  
1057 Chromosome Synapsis Alleviates Mek1-Dependent Suppression of Meiotic DNA  
1058 Repair. *PLoS Biol.* 14: e1002369.
- 1059 Thacker, D., I. Lam, M. Knop and S. Keeney, 2011 Exploiting spore-autonomous fluorescent  
1060 protein expression to quantify meiotic chromosome behaviors in *Saccharomyces*  
1061 *cerevisiae*. *Genetics* 189: 423-439.
- 1062 Tibbles, K. L., S. Sarkar, B. Novak and P. Arumugam, 2013 CDK-dependent nuclear  
1063 localization of B-cyclin Clb1 promotes FEAR activation during meiosis I in budding  
1064 yeast. *PLoS One* 8: e79001.
- 1065 Tung, K. S., E. J. Hong and G. S. Roeder, 2000 The pachytene checkpoint prevents  
1066 accumulation and phosphorylation of the meiosis-specific transcription factor Ndt80.  
1067 *Proc. Nat. Acad. Sci. USA* 97: 12187-12192.

- 1068 Voelkel-Meiman, K., C. Johnston, Y. Thappeta, V. V. Subramanian, A. Hochwagen *et al.*,  
1069 2015 Separable Crossover-Promoting and Crossover-Constraining Aspects of Zip1  
1070 Activity during Budding Yeast Meiosis. *PLoS Genet.* 11: e1005335.
- 1071 Voelkel-Meiman, K., S. S. Moustafa, P. Lefrancois, A. M. Villeneuve and A. J. MacQueen,  
1072 2012 Full-length synaptonemal complex grows continuously during meiotic prophase  
1073 in budding yeast. *PLoS Genet.* 8: e1002993.
- 1074 Wang, L., Z. Xu, M. B. Khawar, C. Liu and W. Li, 2017 The histone codes for meiosis.  
1075 *Reproduction* 154: R65-R79.
- 1076 Wang, Y., C. Y. Chang, J. F. Wu and K. S. Tung, 2011 Nuclear localization of the meiosis-  
1077 specific transcription factor Ndt80 is regulated by the pachytene checkpoint. *Mol.*  
1078 *Biol. Cell* 22: 1878-1886.
- 1079 Weber, C. M., and S. Henikoff, 2014 Histone variants: dynamic punctuation in transcription.  
1080 *Genes Dev.* 28: 672-682.
- 1081 White, E. J., C. Cowan, W. Z. Cande and D. B. Kaback, 2004 In vivo analysis of  
1082 synaptonemal complex formation during yeast meiosis. *Genetics* 167: 51-63.
- 1083 Winter, E., 2012 The Sum1/Ndt80 transcriptional switch and commitment to meiosis in  
1084 *Saccharomyces cerevisiae*. *Microbiol. Mol. Biol. Rev.* 76: 1-15.
- 1085 Xu, L., B. M. Weiner and N. Kleckner, 1997 Meiotic cells monitor the status of the  
1086 interhomolog recombination complex. *Genes Dev.* 11: 106-118.
- 1087 Yamada, S., K. Kugou, D. Q. Ding, Y. Fujita, Y. Hiraoka *et al.*, 2018 The histone variant  
1088 H2A.Z promotes initiation of meiotic recombination in fission yeast. *Nucleic Acids*  
1089 *Res.* 46: 609-620.
- 1090
- 1091
- 1092

1092 **Figure Legends**

1093

1094

1095 **Figure 1. Localization of H2A.Z during meiotic prophase depends on SWR1.** (A)  
1096 Representative images of wild type and *swr1* live cells, at 15 hours after meiotic induction  
1097 (peak of prophase I), expressing *HTZ1-GFP*. (B) Immunofluorescence of spread meiotic  
1098 chromosomes from wild type and *swr1* stained with DAPI (red) to visualize chromatin, anti-  
1099 GFP (green) to detect H2A.Z, and anti-Pch2 (blue) to mark the nucleolar region (arrow). (C)  
1100 Western blot analysis of H2A.Z production during meiosis detected with anti-GFP antibodies.  
1101 Tubulin was used as a loading control. Strains are DP840 (*HTZ1-GFP*) and DP841 (*swr1*  
1102 *HTZ1-GFP*).

1103

1104 **Figure 2. H2A.Z is required for proper meiotic development.** (A) Time course analysis of  
1105 meiotic nuclear divisions; the percentage of cells containing two or more nuclei is  
1106 represented. Error bars: SD; n=6. (B) Sporulation efficiency, determined by microscopic  
1107 counting, as the percentage of cells forming mature or immature asci after 3 days on  
1108 sporulation plates. Error bars: SD; n=3. (C) Representative DIC images of asci. (D) Spore  
1109 viability determined by tetrad dissection. At least 288 spores were scored for each strain.  
1110 Error bars: SD; n=5. (E) Distribution of tetrad types. The percentage of tetrads with 4, 3, 2, 1  
1111 and 0 viable spores (4-sv, 3-sv, 2-sv, 1-sv and 0-sv, respectively) is represented. Error bars:  
1112 SD; n=3. (F) Recombination frequency, expressed as map distance (cM), in a chromosome  
1113 VIII interval (see Figure S1). Error bars: range; n=2. Strains used in (A)-(E) are DP421 (wild  
1114 type) and DP630 (*htz1*). Strains used in (F) are DP969 (wild type), DP973 (*htz1*) and DP974  
1115 (*mer3*).

1116

1117 **Figure 3. The inefficient meiotic progression of the *htz1* single mutant does not result**  
1118 **from activation of the meiotic recombination checkpoint.** (A, B) Time course analysis of  
1119 meiotic nuclear divisions; the percentage of cells containing two or more nuclei is  
1120 represented. Error bars: SD; n=3. (C) Western blot analysis of Hop1-T318 phosphorylation  
1121 and Mek1 activity at the indicated time points in meiosis. PGK was used as a loading control.  
1122 Strains in (A-C) are DP421 (wild type), DP630 (*htz1*), DP713 (*mek1*), DP1523 (*spo11*),  
1123 DP1144 (*htz1 spo11*) and DP1259 (*htz1 mek1*). (D) Time course analysis of *ZIP1-GFP*  
1124 induction. The percentage of cells showing Zip1-GFP nuclear fluorescence during early time

1125 points after transfer to sporulation conditions is represented. Strains are: DP437 (wild type)  
1126 and DP838 (*htz1*). Error bars: SD; n=3.

1127

1128 **Figure 4. Robust checkpoint-dependent meiotic arrest in *zip1 htz1*.** (A), (B) Time course  
1129 analysis of meiotic nuclear divisions; the percentage of cells containing two or more nuclei is  
1130 represented. Error bars: SD; n=3. Strains are DP421 (wild type), DP422 (*zip1*), DP776 (*zip1*  
1131 *htz1*), DP1524 (*zip1 spo11*), DP815 (*zip1 htz1 spo11*) and DP816 (*zip1 htz1 ddc2*). (C)  
1132 Localization and quantification of Rad51 foci as markers for unrepaired DSBs on spread  
1133 meiotic nuclei of *zip1* (DP449), *zip1 htz1* (DP776) and *zip1 htz1 spo11* (DP815) after 16 h of  
1134 meiotic induction. Only prophase I nuclei, as assessed by tubulin staining, were scored.  
1135 Representative images are shown. (D) Western blot analysis of the indicated molecular  
1136 markers of checkpoint activity at different levels in the pathway. PGK was used as a loading  
1137 control. Strains are DP421 (wild type), DP422 (*zip1*) and DP631 (*zip1 htz1*). For detection of  
1138 Myc-tagged Swe1, the strains used are DP1353 (wild type), DP1354 (*zip1*) and DP1414 (*zip1*  
1139 *htz1*).

1140

1141 **Figure 5. Analysis of meiotic checkpoint recovery.** (A) Schematic representation of the  
1142 experimental setup for conditional *ZIP1* induction in wild type (DP1185) and *htz1* (DP1186)  
1143 cells containing the *GAL4-ER* transcriptional activator regulated by  $\beta$ -estradiol and *P<sub>GALI</sub>-*  
1144 *ZIP1-GFP*. (B) Representative fluorescence microscopy images showing SC incorporation of  
1145 Zip1-GFP. Cells were imaged 3 hours after  $\beta$ -estradiol addition. (C) Time course analysis of  
1146 meiotic nuclear divisions; the percentage of cells containing two or more nuclei is  
1147 represented. The arrow indicates  $\beta$ -estradiol addition (blue lines and symbols). Error bars:  
1148 range; n=2. (D) Western blot analysis of the indicated molecular markers of checkpoint  
1149 activity. PGK was used as a loading control.

1150

1151 **Figure 6. *NDT80* overexpression partially suppresses *zip1 htz1* meiotic arrest.** (A), (B)  
1152 Time course analysis of meiotic nuclear divisions; the percentage of cells containing two or  
1153 more nuclei is represented. Strains are DP422 (*zip1*) in (A) and DP1017 (*zip1 htz1*) in (B),  
1154 transformed with vector alone (pRS426) or with high-copy plasmids overexpressing *CDC5*  
1155 (pJC29) or *NDT80* (pSS263), denoted as *OE-CDC5* and *OE-NDT80*, respectively. Error bars:  
1156 SD; n=3.

1157

1158

1159 **Figure 7. Impact of Cdc28-Y19 phosphorylation and Clb1 levels on *zip1 htz1* meiotic**  
1160 **arrest.** (A) Schematic representation of the regulation of CDK activity by Cdc28-Y19  
1161 phosphorylation controlled by the opposite action of the Swe1 kinase and the Mih1  
1162 phosphatase. (B) Western blot analysis of Cdc28-Y19 phosphorylation in the indicated  
1163 strains. Total Cdc28 is also shown as control. (C) Time course analysis of meiotic nuclear  
1164 divisions; the percentage of cells containing two or more nuclei is represented. Error bars:  
1165 SD; n=3. (D) Western blot analysis of the indicated molecular markers of checkpoint activity.  
1166 Swe1 was detected with anti-myc antibodies. PGK was used as a loading control. Strains in  
1167 (B-D) are: DP1353 (wild type), DP1414 (*zip1 htz1*), DP1113 (*zip1 htz1 swe1*) and DP1416  
1168 (*zip1 htz1 cdc28-AF*). To overexpress *MIH1* and *CLB1*, the DP1414 and DP1416 strains were  
1169 transformed with high-copy plasmids pSS265 (*OE-MIH1*) and pR2045 (*OE-CLB1*),  
1170 respectively. (E) Whole-cell immunofluorescence using anti-tubulin antibodies in *zip1 htz1*  
1171 (DP1017) and *zip1 htz1 cdc28-AF* (DP1154) cells at 48 hours in meiosis. Representative  
1172 nuclei of prophase, meiosis I and meiosis II stages are shown. The quantification is presented  
1173 in the graph. 169 and 119 nuclei were scored for *zip1 htz1* and *zip1 htz1 cdc28-AF*,  
1174 respectively. Error bars: range; n=2.

1175  
1176 **Figure 8. Exit from prophase I in *S. cerevisiae*.** (A) A model for the regulation of the  
1177 prophase to meiosis I transition by the meiotic recombination checkpoint. See text for details.  
1178 The discontinuous line connecting Mek1 and Swe1 indicates that there is no evidence for  
1179 direct phosphorylation of Swe1 by Mek1. A functional connection or dependency between  
1180 DSB repair by sister chromatid recombination and entry into meiosis I is represented by  
1181 dotted lines. (B), (C) and (D) Impact on meiotic progression resulting from the mutant  
1182 conditions indicated. Green and red colors represent the predominant positive and negative  
1183 effects, respectively.

**Table 1.** Subset of genes with decreased meiotic prophase expression in *htz1* ( $p < 0.05$ )

| GENE                | LFC (>1.5) |
|---------------------|------------|
| Cell cycle          |            |
| <i>BFA1</i>         | 2.393400   |
| <i>LTE1</i>         | 2.277104   |
| <i>GIP4</i>         | 2.268020   |
| <i>BUB2</i>         | 1.704342   |
| <i>MCK1</i>         | 1.586536   |
| <i>MIH1</i>         | 1.583281   |
| <i>CDC7</i>         | 1.536321   |
| Meiotic genes       |            |
| <i>RME1</i>         | 1.852768   |
| <i>RPD3</i>         | 1.799528   |
| <i>HFM1</i>         | 1.683362   |
| <i>REC8</i>         | 1.666158   |
| <i>MEK1*</i>        | 1.599045   |
| <i>MRE11</i>        | 1.597116   |
| <i>SKI8</i>         | 1.570898   |
| <i>IME4</i>         | 1.531359   |
| <i>ZIP2</i>         | 1.511252   |
| <i>SPO22</i>        | 1.504426   |
| <i>HOP1</i>         | 1.499766   |
| DNA damage response |            |
| <i>SRS2</i>         | 1.898810   |
| <i>RAD17</i>        | 1.705357   |
| <i>TOF1</i>         | 1.612276   |
| <i>MEC1</i>         | 1.509767   |
| <i>IRC6</i>         | 1.505446   |
| Chromatin           |            |
| <i>SWC3</i>         | 2.864716   |
| <i>SWI3</i>         | 2.070301   |
| <i>RSC8</i>         | 1.850621   |
| <i>SPT20</i>        | 1.631780   |
| <i>HFI1</i>         | 1.629896   |
| <i>CHD1</i>         | 1.514238   |

LFC: linear fold change (>1.5)

\* $p=0.07$



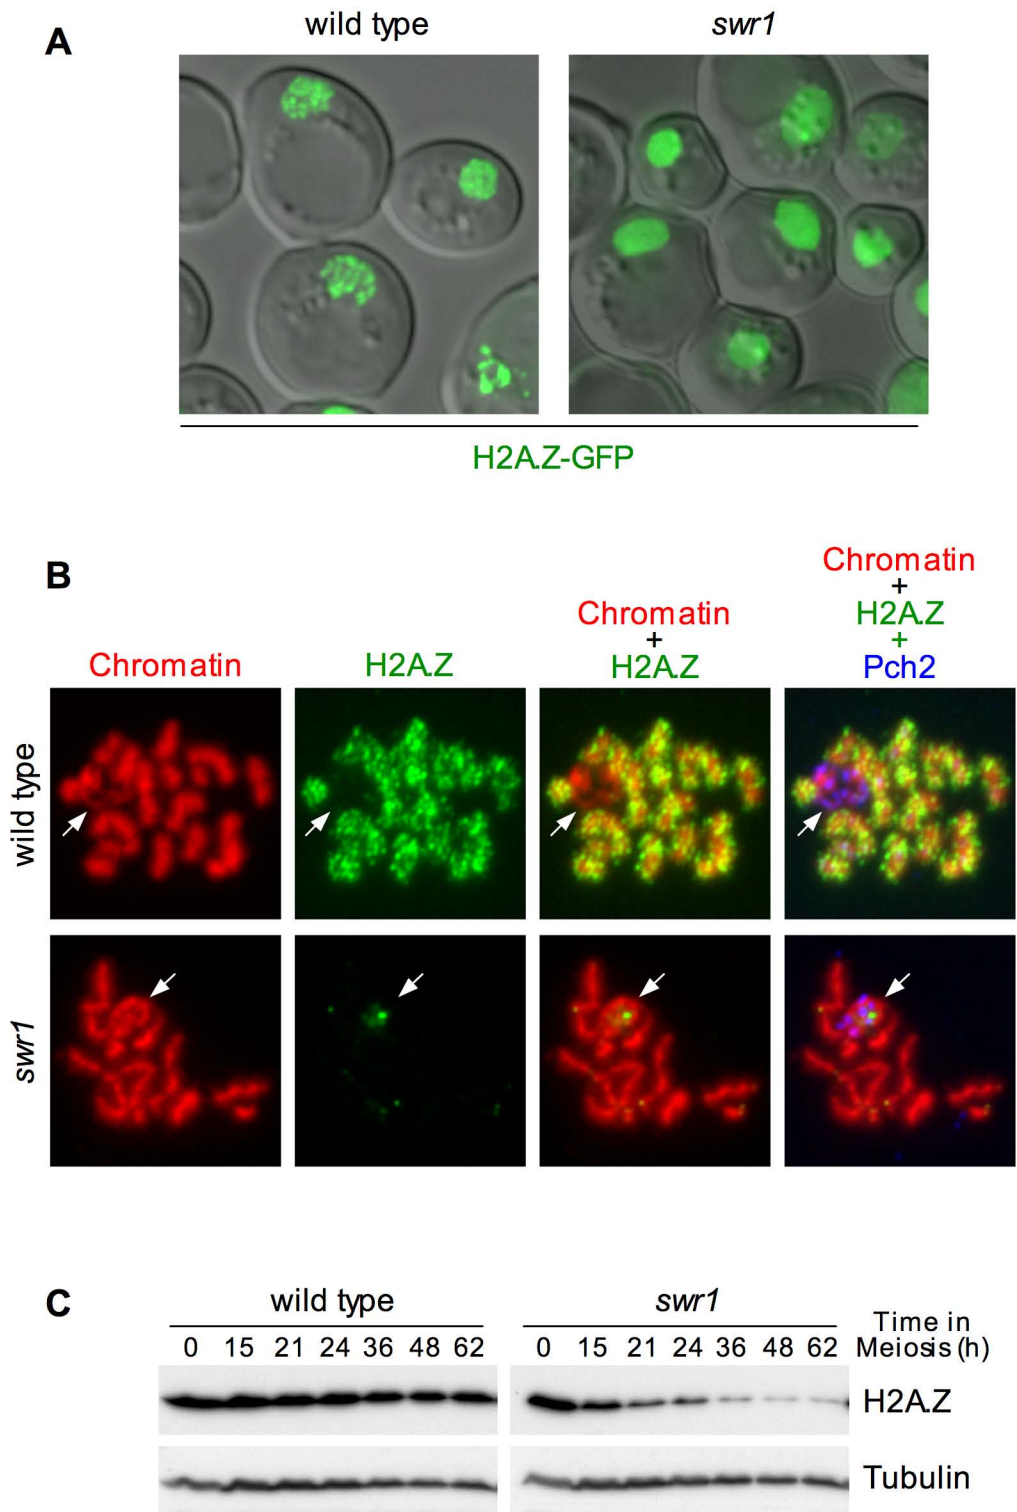

Figure 1

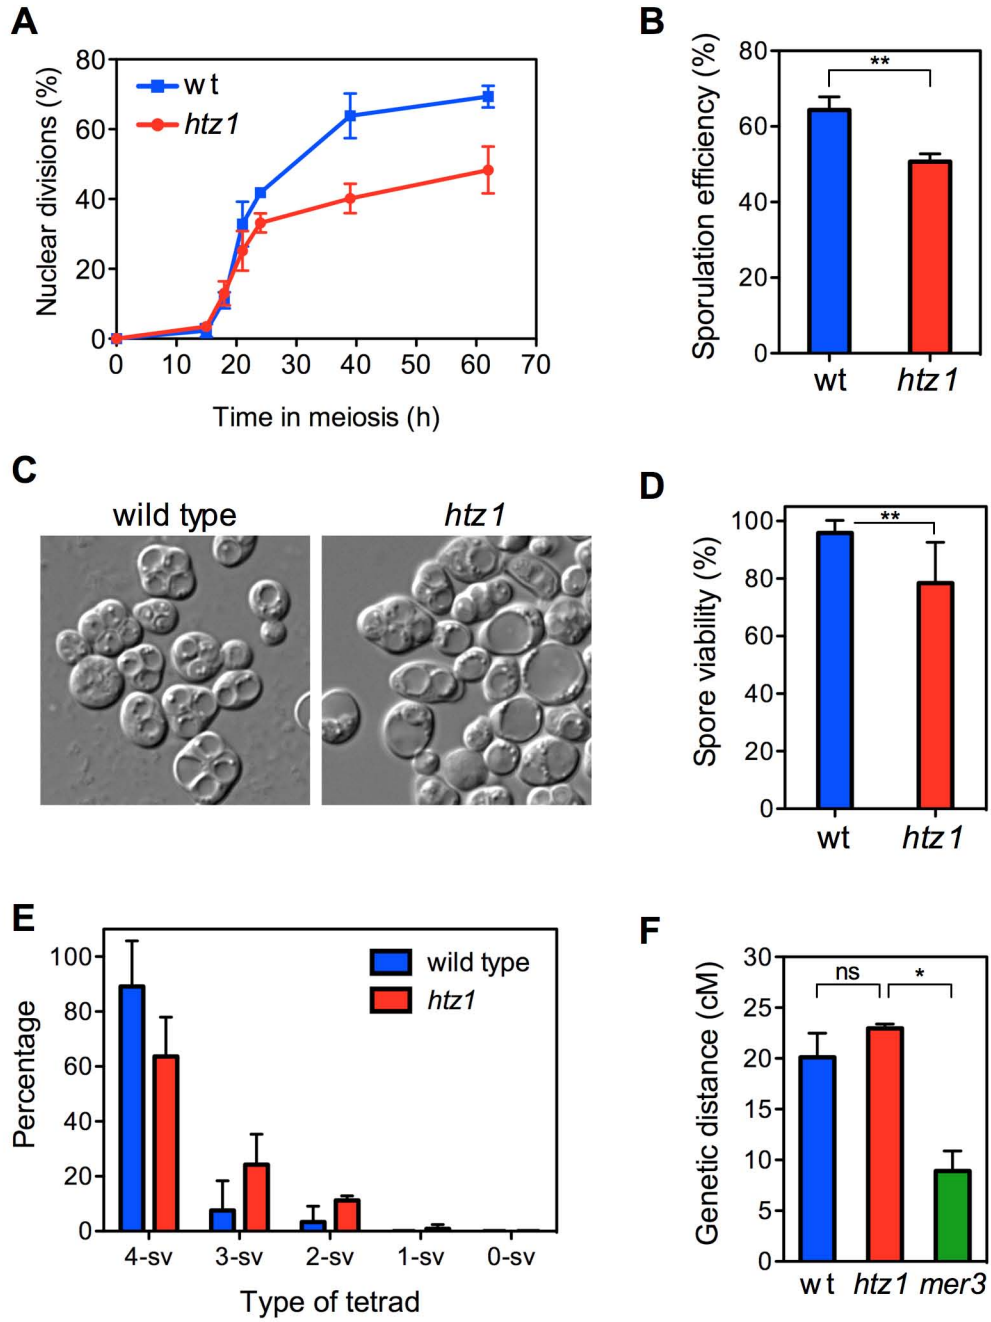

**Figure 2**

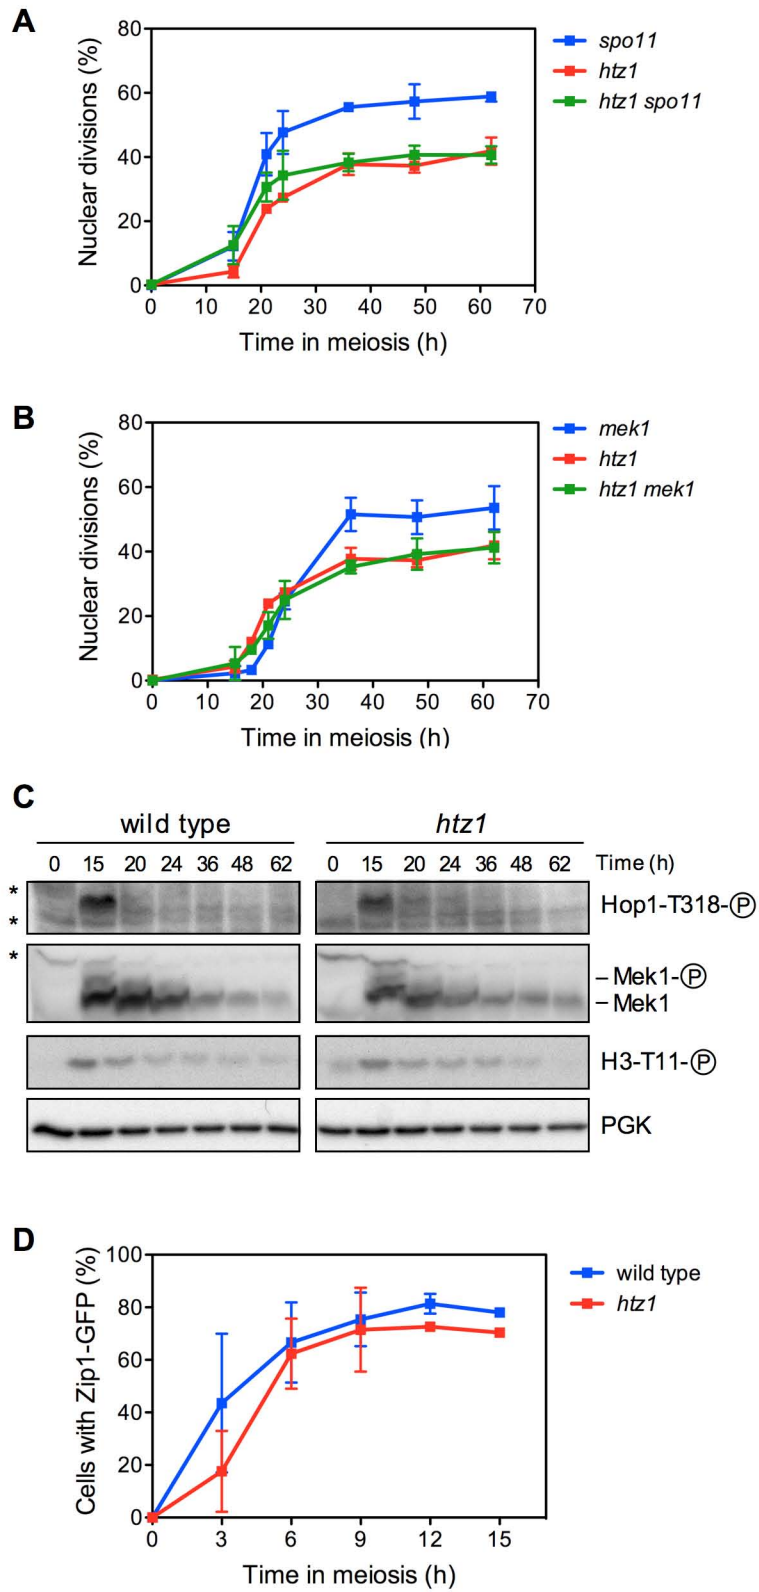

**Figure 3**

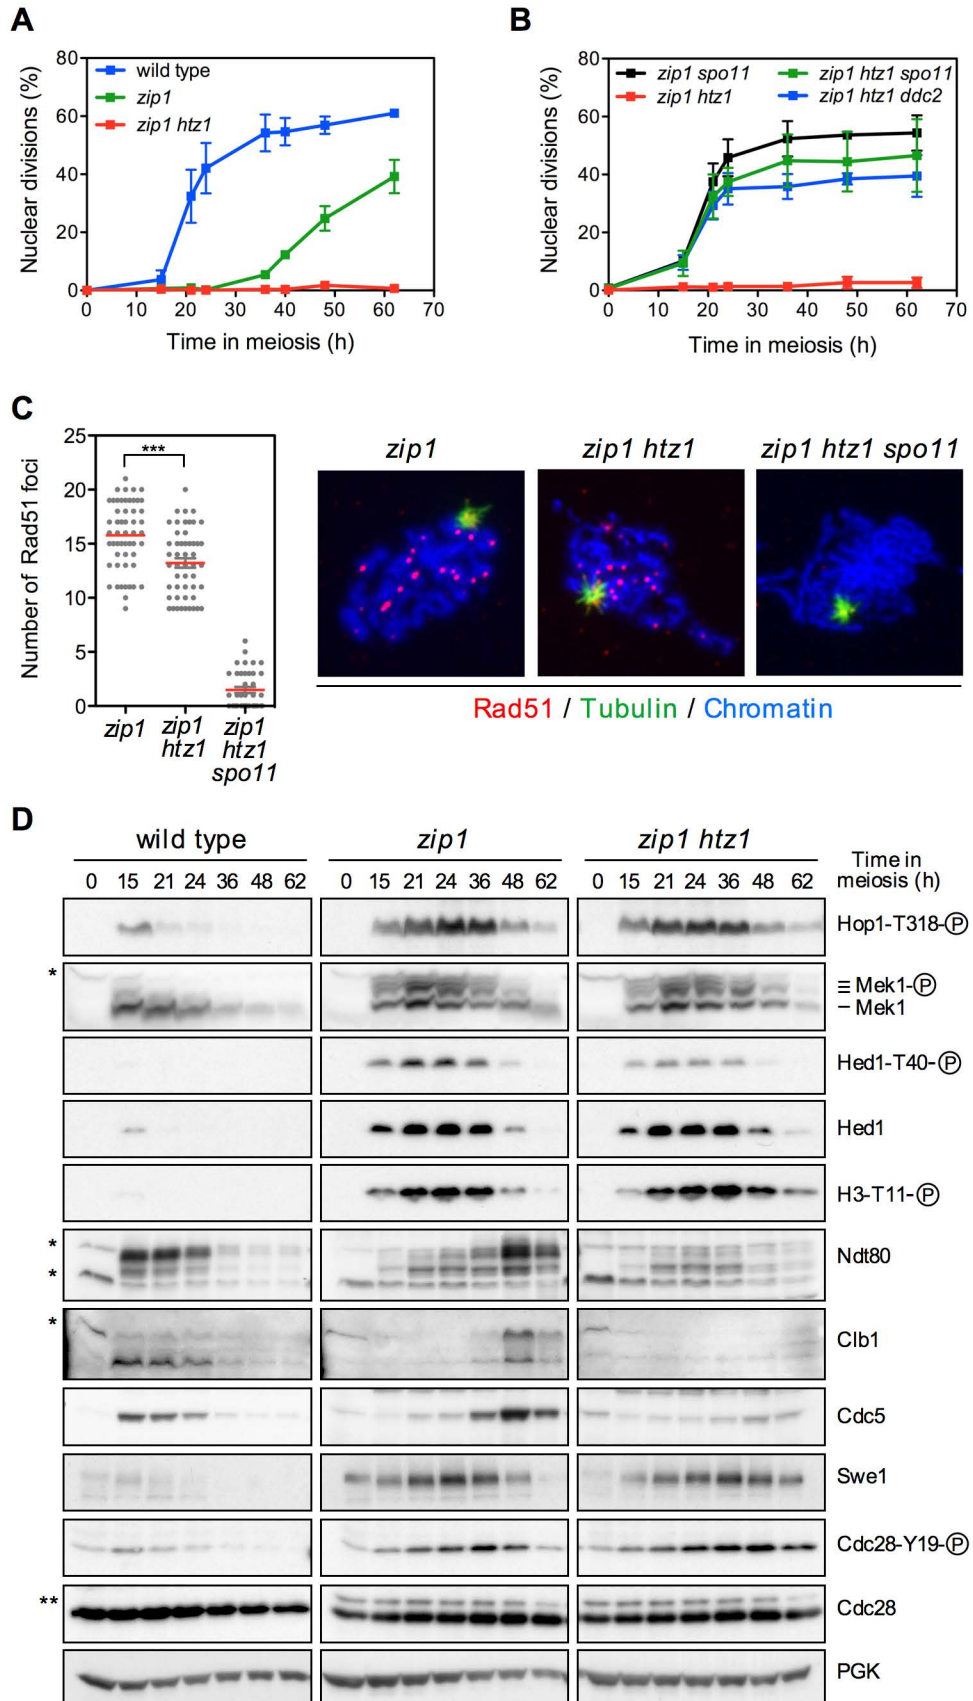

Figure 4

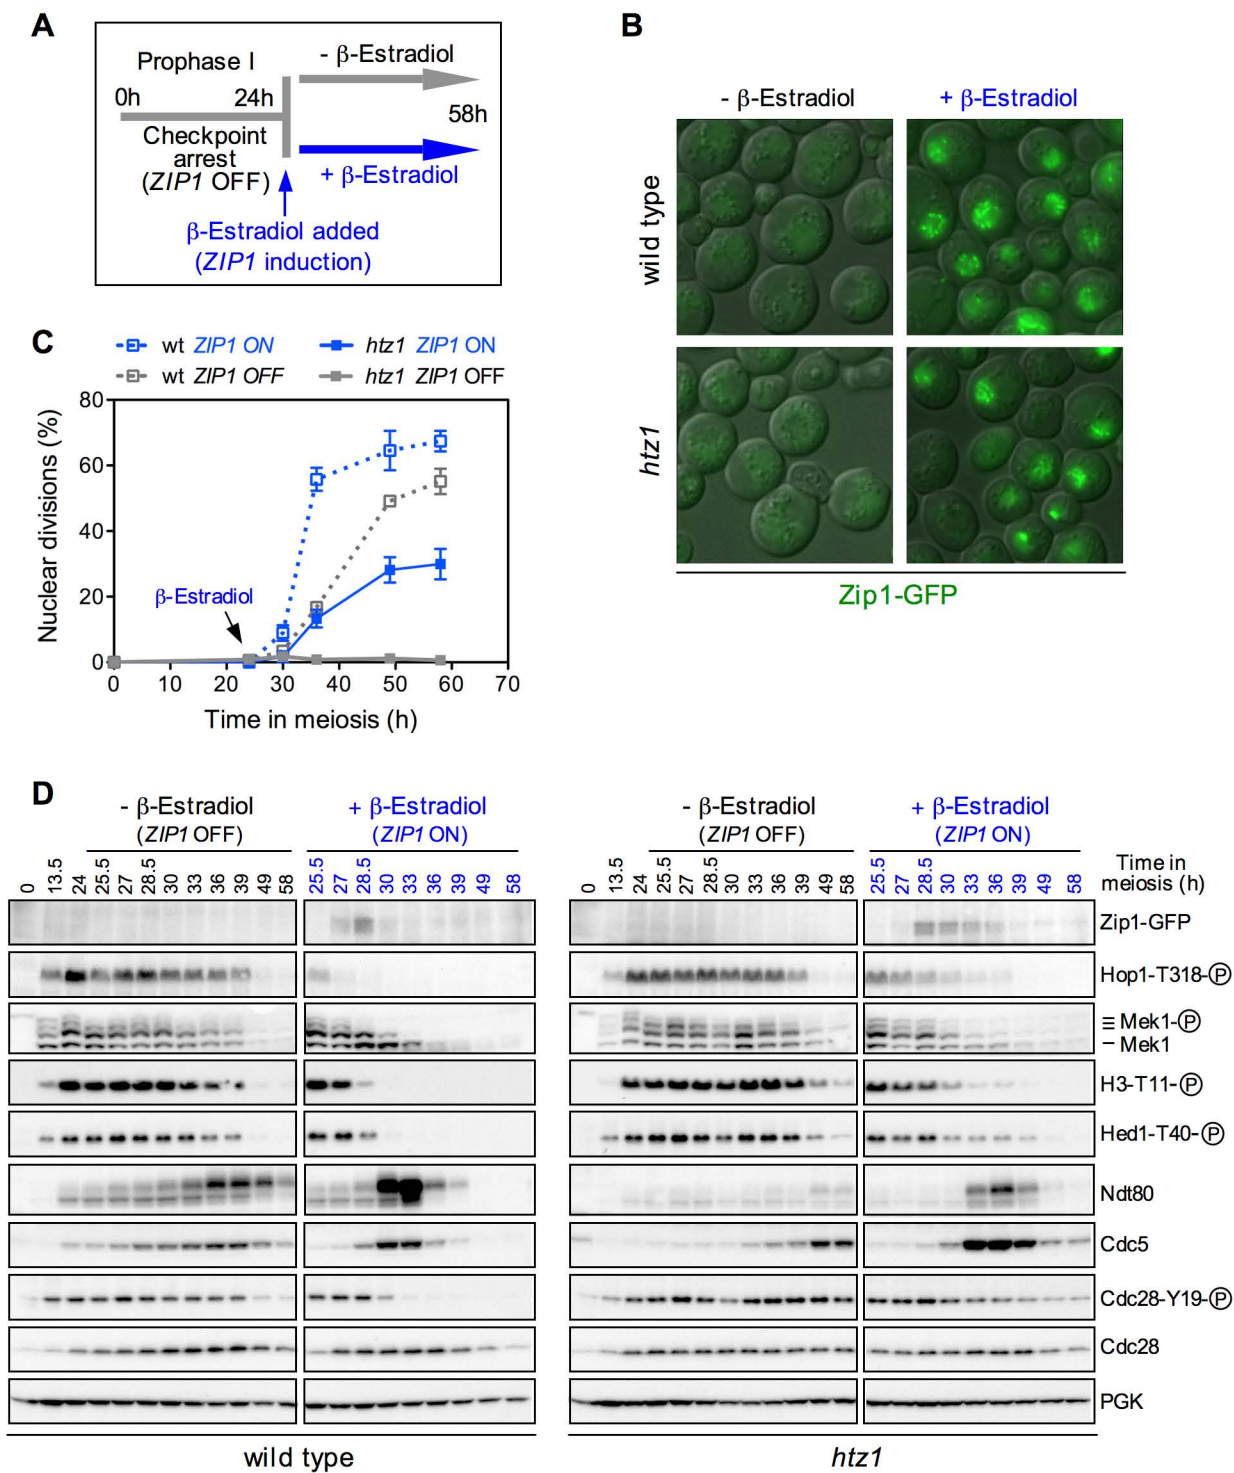

Figure 5

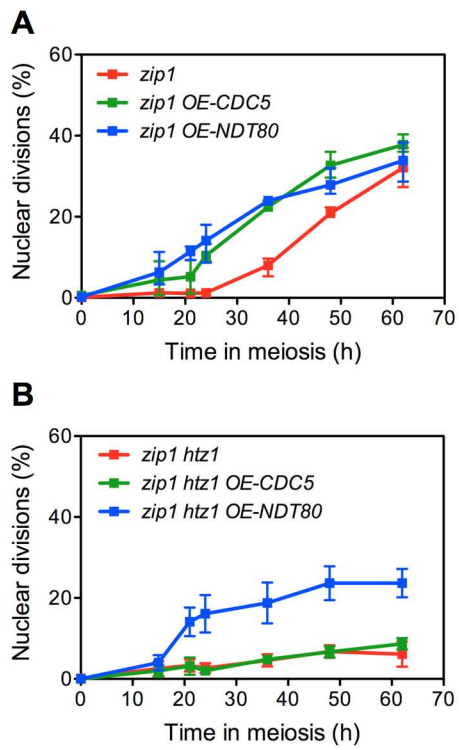

Figure 6



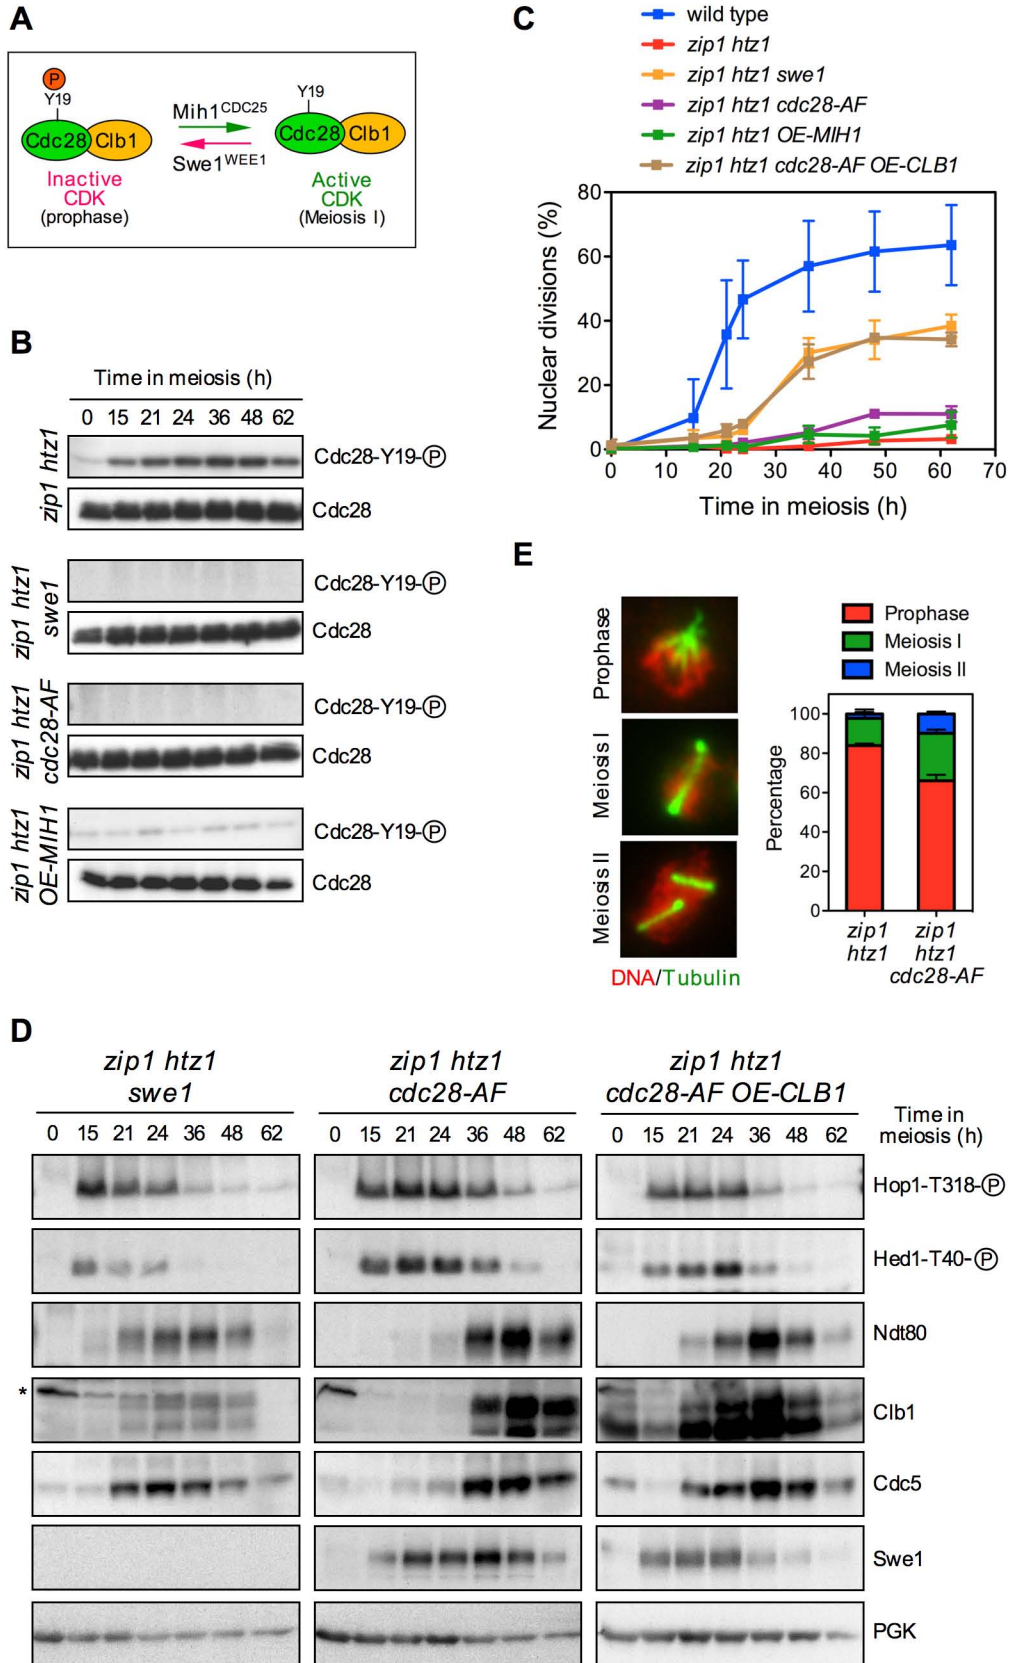

Figure 7

**A**

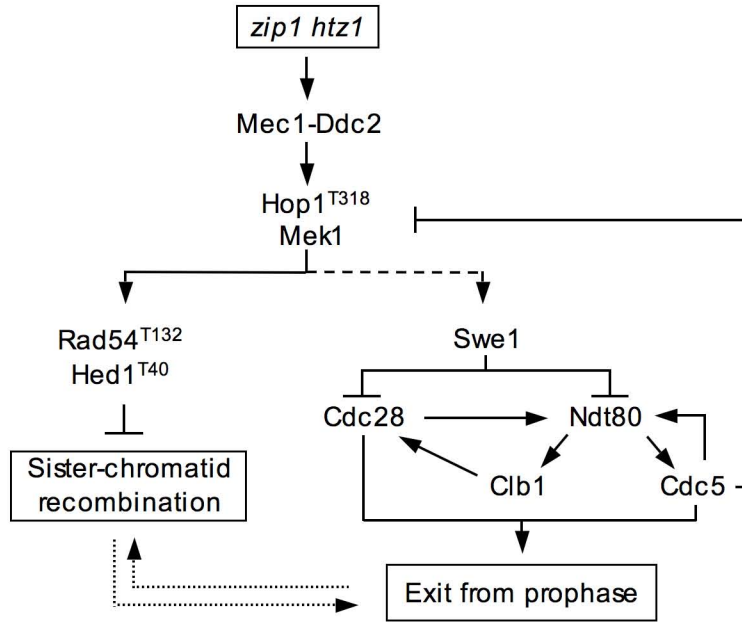

**B**

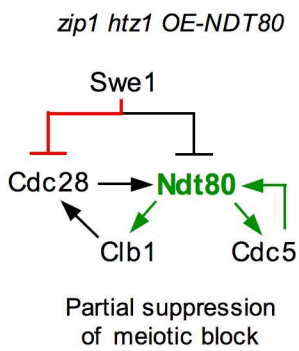

**C**

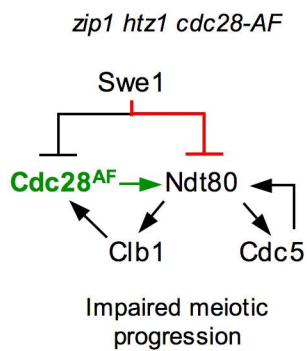

**D**

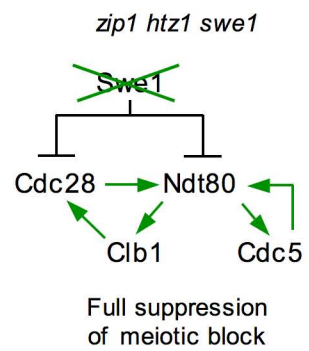

**Figure 8**

## **SUPPLEMENTAL DATA**

### **Functional impact of the H2A.Z histone variant during meiosis in *Saccharomyces cerevisiae***

Sara González-Arranz\*, Santiago Caveró\*, Macarena Morillo-Huesca<sup>†</sup>, Eloisa Andújar<sup>‡</sup>, Mónica Pérez-Alegre<sup>‡</sup>, Félix Prado<sup>†</sup> and Pedro San-Segundo\*, <sup>1</sup>

\*Institute of Functional Biology and Genomics (IBFG). Consejo Superior de Investigaciones Científicas (CSIC) and University of Salamanca, 37007 Salamanca, Spain

<sup>†</sup>Department of Genome Biology and <sup>‡</sup>Genomics Unit. Centro Andaluz de Biología Molecular y Medicina Regenerativa (CABIMER), CSIC-University of Seville-University Pablo Olavide, 41092 Seville, Spain

<sup>1</sup>Corresponding author

#### **Supplemental Figures (Figures S1-S8)**

**Table S1 (Strains list)**

**Table S2 (Plasmids list)**

**Table S3 (Antibodies list)**

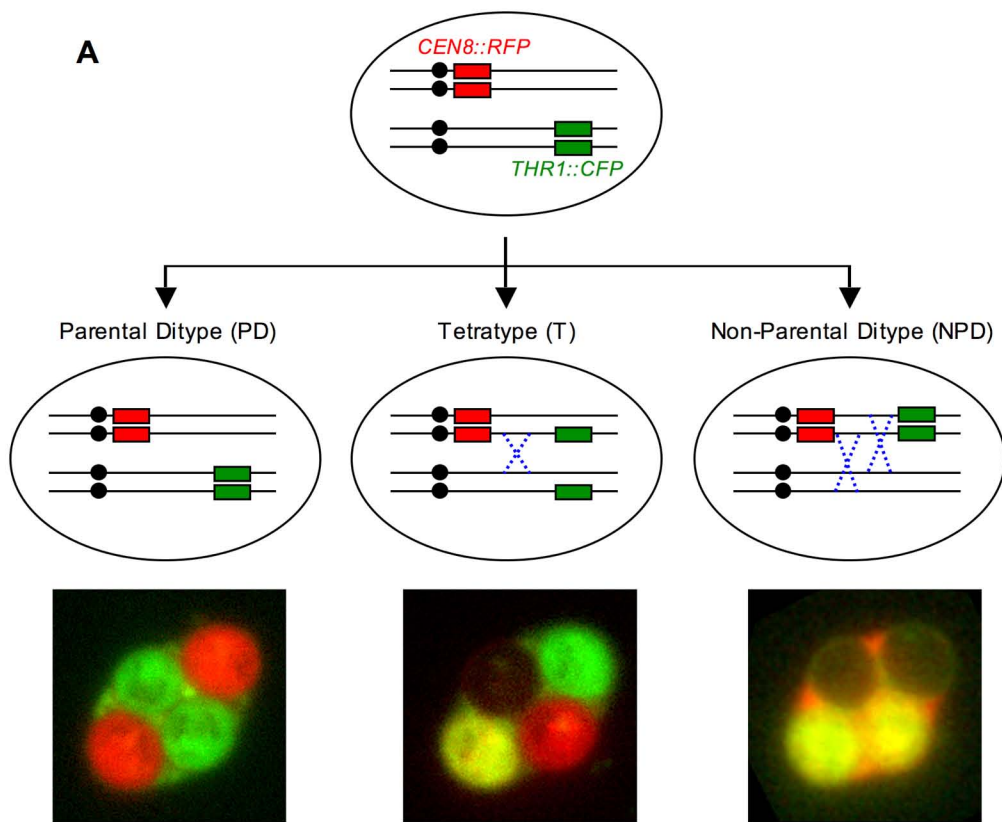

**B**

|             | PD(%) | T(%)  | NPD(%) | Genetic distance (cM) | n    |
|-------------|-------|-------|--------|-----------------------|------|
| wild type   | 61.62 | 38.00 | 0.37   | 20.11                 | 2245 |
| <i>htz1</i> | 55.92 | 43.72 | 0.38   | 22.98                 | 1027 |
| <i>mer3</i> | 73.71 | 16.13 | 0      | 8.91                  | 302  |

**Figure S1. Analysis of crossover frequency by spore-autonomous fluorescence assay.** (A) Cartoon depicting the potential configuration of the fluorescent reporter markers on Chromosome VIII and representative images of the different types of asci, according to (Thacker *et al.* 2011). Dashed crosses represent possible recombination events leading to each configuration. (B) The table shows the frequency of PD, T and NPD tetrads, map distance expressed in centiMorgan (cM) and the number of tetrads scored (n) pooled from two independent experiments. Strains are DP969 (wild type), DP973 (*htz1*) and DP974 (*mer3*).

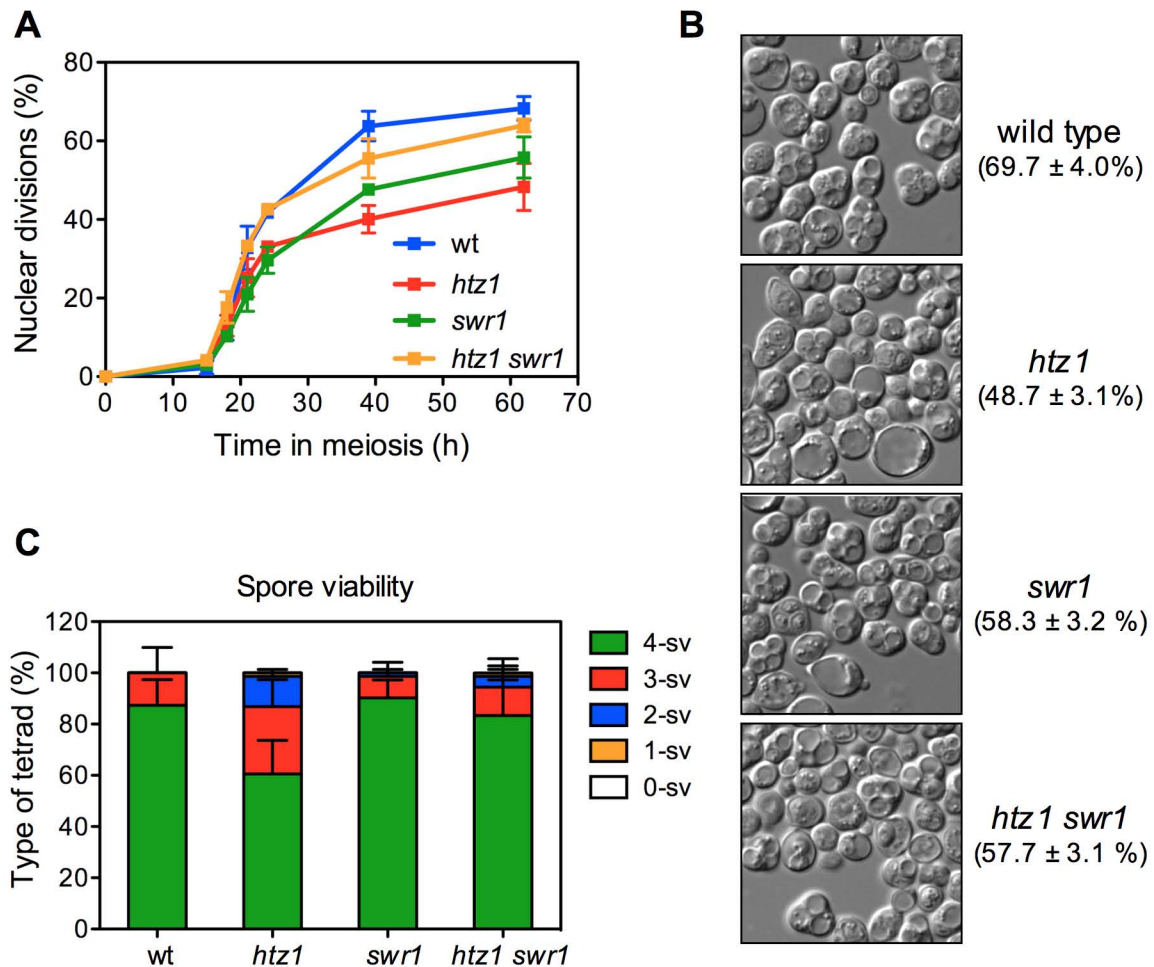

**Figure S2. Meiotic impact of the SWR1 complex in the presence or absence of H2A.Z.** (A) Time course analysis of meiotic nuclear divisions; the percentage of cells containing two or more nuclei is represented. Error bars: range; n=2. (B) Representative DIC images of asci. The sporulation frequency after 62 hours in liquid sporulation medium is shown in parentheses. (C) Spore viability determined by tetrad dissection. The distribution of tetrad types as the percentage of tetrads with 4, 3, 2, 1 and 0 viable spores (4-sv, 3-sv, 2-sv, 1-sv and 0-sv, respectively) is represented. At least 288 spores were scored for each strain. Error bars: range; n=2. Strains are DP421 (wild type), DP630 (*htz1*), DP1174 (*swr1*) and DP1056 (*htz1 swr1*).

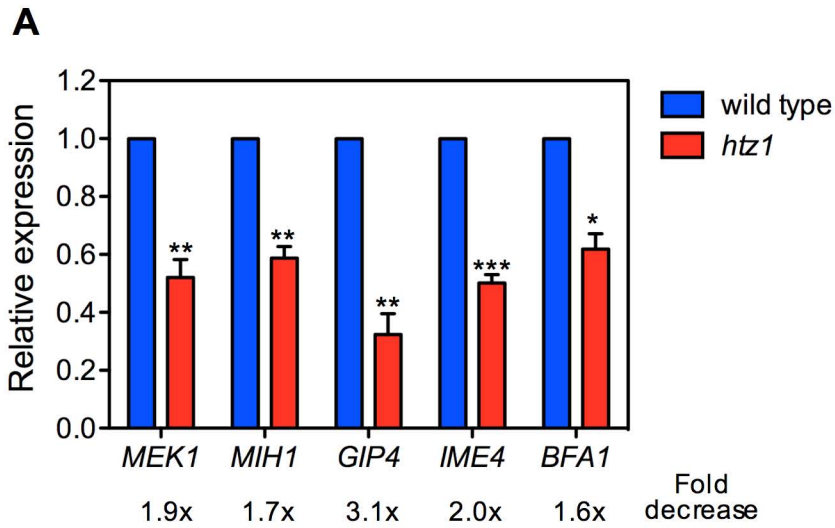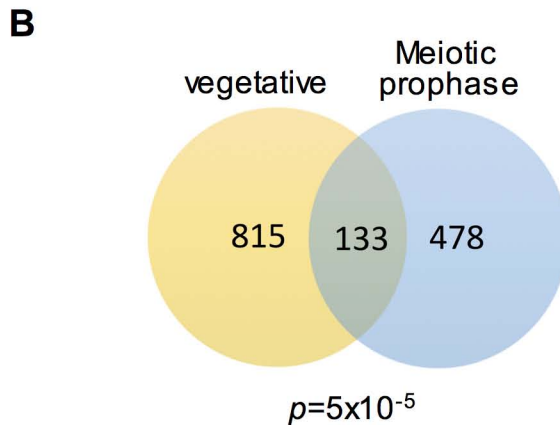

**Figure S3. Altered meiotic gene expression in the *htz1* mutant.** (A) RT-PCR analysis of mRNA levels of the indicated genes at 15 hours in meiosis. The graph shows relative levels in *htz1* normalized to those in the wild type. Error bars: SD; n=3 (except for *BFA1*; n=2). (B) Venn diagram showing the number of overlapping genes misregulated by *htz1* (1.5-fold cutoff) in vegetative and meiotic cells (15 h). The data for vegetative cells was obtained from (Morillo-Huesca *et al.* 2010). The *p* value was calculated by a hypergeometric test. Strains are DP421 (wild type) and DP1016 (*htz1*).



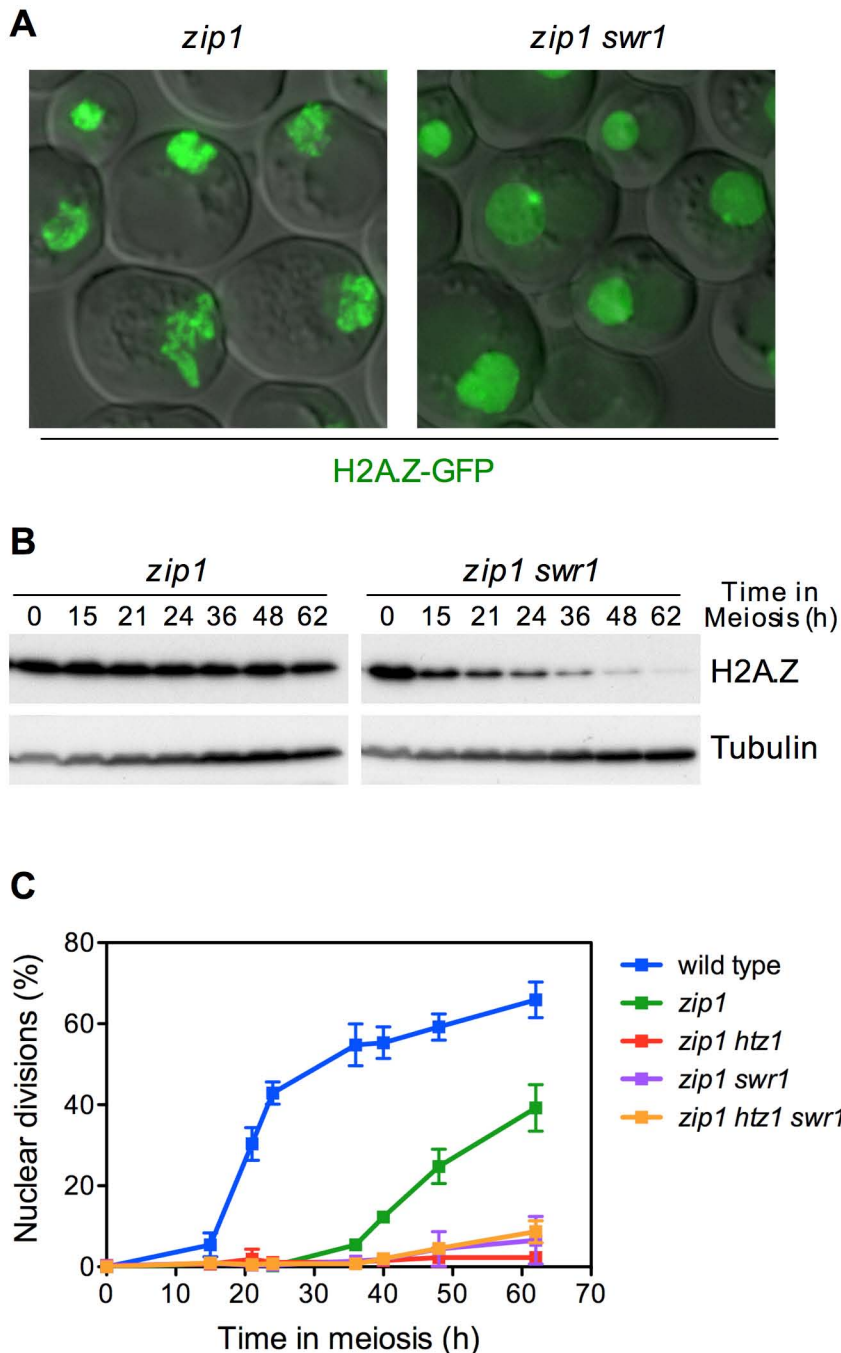

**Figure S4. SWR1-dependent chromatin incorporation of H2A.Z is required for normal *zip1*-induced meiotic checkpoint response.** (A) Representative images of *zip1* and *zip1 swr1* cells expressing *HTZ1-GFP* at 15 hours after meiotic induction. (B) Western blot analysis of H2A.Z production during meiosis detected with anti-GFP antibodies. Tubulin was used as a loading control. Strains in (A-B) are DP839 (*zip1 HTZ1-GFP*) and DP842 (*zip1 swr1 HTZ1-GFP*). (C) Time course analysis of meiotic nuclear divisions; the percentage of cells containing two or more nuclei is represented. Error bars: SD; n=3. Strains are DP421 (wild type), DP422 (*zip1*), DP776 (*zip1 htz1*), DP804 (*zip1 swr1*) and DP777 (*zip1 swr1 htz1*).

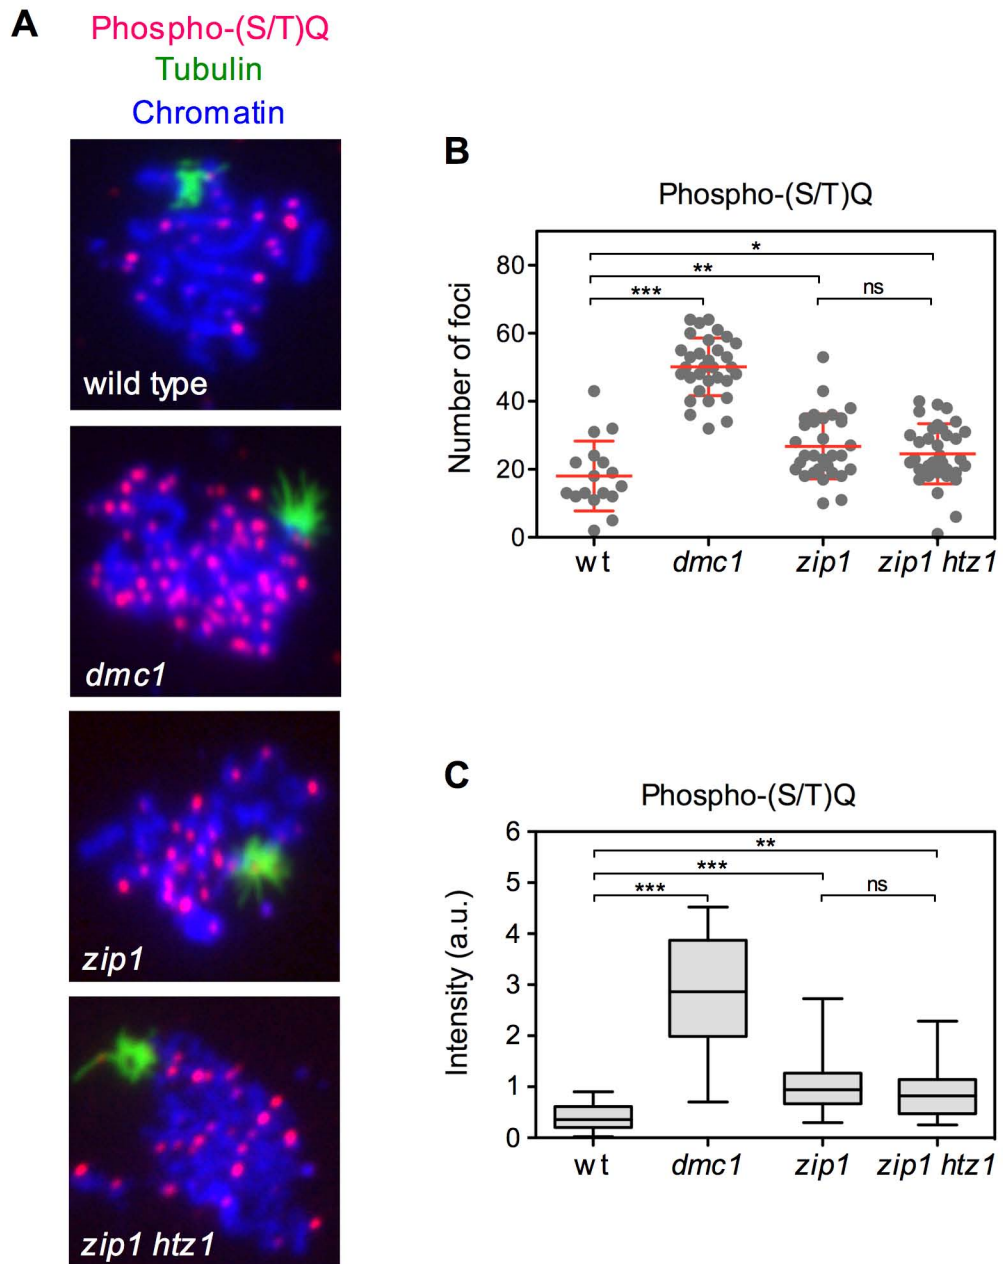

**Figure S5. The *zip1 htz1* mutant does not sustain additional Mec1/Tel1-dependent DNA damage signaling compared to *zip1*.** (A) Immunofluorescence of prophase meiotic chromosomes stained with DAPI (blue), and anti-phospho-(S/T)-Q (red) and anti-tubulin (green) antibodies. The *dmc1* mutant was included as a positive control for the accumulation of extensive meiotic DNA damage (unrepaired resected DSBs). Representative nuclei are shown. (B) Quantification of the number of phospho-(S/T)-Q foci per nucleus. Error bars: SD. (C) Quantification of the fluorescence intensity of the phospho-(S/T)-Q signal per nucleus. Whiskers in the box plot represent the maximum to minimum values. The strains used and the number of nuclei scored in (B-C) are: DP421 (wild type; n=17), DP590 (*dmc1*; n=32), DP1525 (*zip1*; n=31) and DP1526 (*zip1 htz1*; n=34).

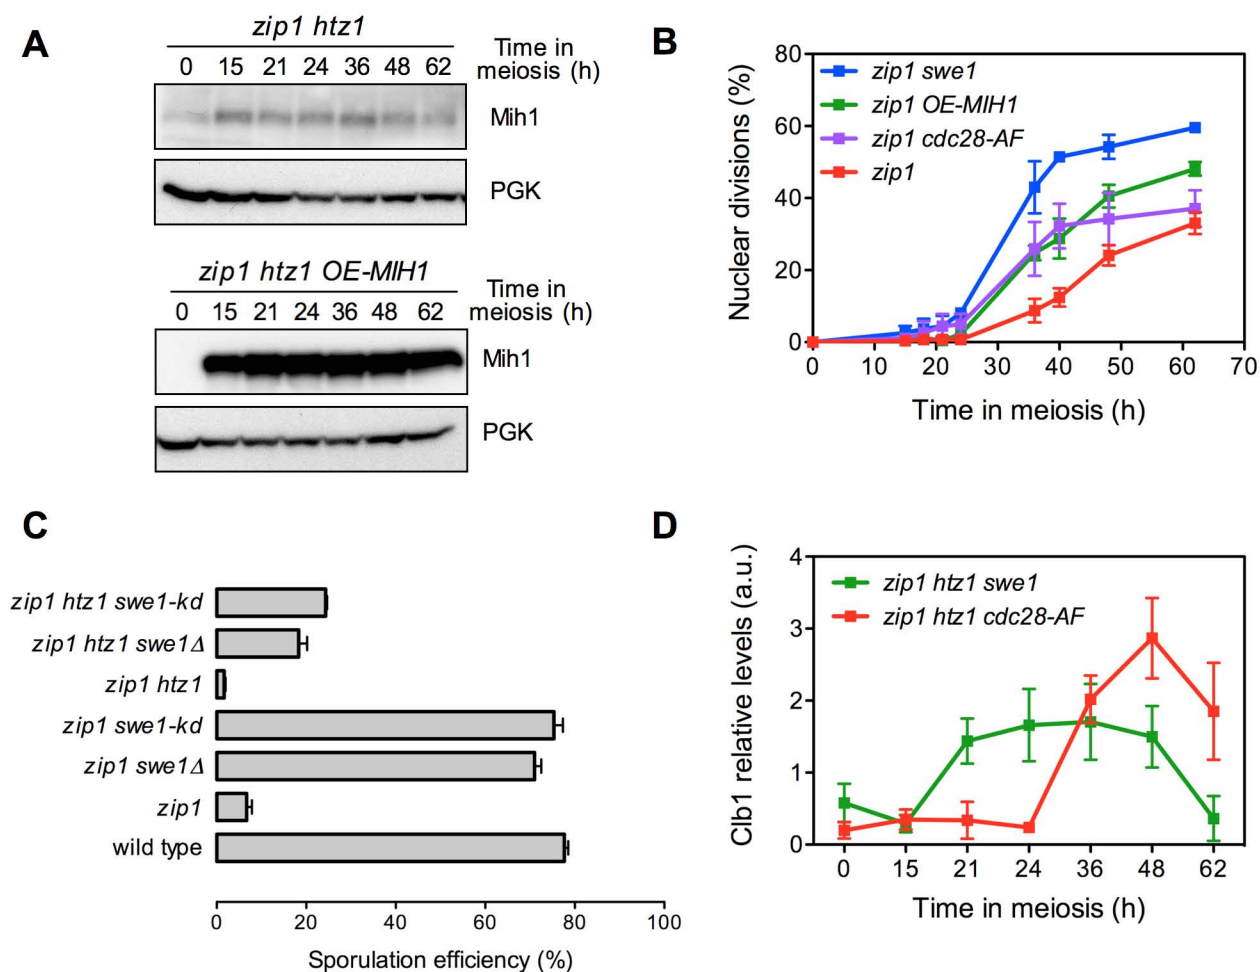

**Figure S6. Additional analysis of the role of CDK inhibitory phosphorylation in the meiotic checkpoint.** (A) Western blot showing *MIH1-GFP* overexpression from the *HOP1* promoter in a high-copy plasmid. The DP1134 strain (*zip1 htz1 MIH1-GFP*) was transformed with vector alone (left panels) or with the pSS265 plasmid (right panels). PGK was used as a loading control. MiH1 was detected with anti-GFP antibodies. (B) Faster meiotic progression in *zip1 cdc28-AF* and *zip1 OE-MIH1* compared to *zip1*. Time course analysis of meiotic nuclear divisions; the percentage of cells containing two or more nuclei is represented. Strains are DP1157 (*zip1 swe1*), DP1153 (*zip1 cdc28-AF*) and DP422 transformed with empty vector pSS248 (*zip1*) or with pSS265 (*zip1 OE-MIH1*). Error bars: SD; n=3. (C) The kinase-dead *swe1-N584A* mutant (*swe1-kd*) phenocopies *SWE1* deletion. The sequence changes introduced to generate the *swe1-N584A* mutation in the genomic locus by *delitto perfetto* are shown. The graph represents the sporulation efficiency determined by microscopic counting as the percentage of cells forming mature or immature asci after 3 days on sporulation plates. Error bars: SD; n=3. Strains are: DP1353 (wild type), DP1354 (*zip1*), DP1157 (*zip1 swe1*) and DP1467 (*zip1 swe1-kd*), DP1414 (*zip1 htz1*), DP1113 (*zip1 htz1 swe1*) and DP1468 (*zip1 htz1 swe1-kd*). (D) Quantification of Clb1 levels, normalized to PGK, throughout meiosis in the indicated strains. Error bars: SD; n=3. Strains are DP1113 (*zip1 htz1 swe1*) and DP1416 (*zip1 htz1 cdc28-AF*).



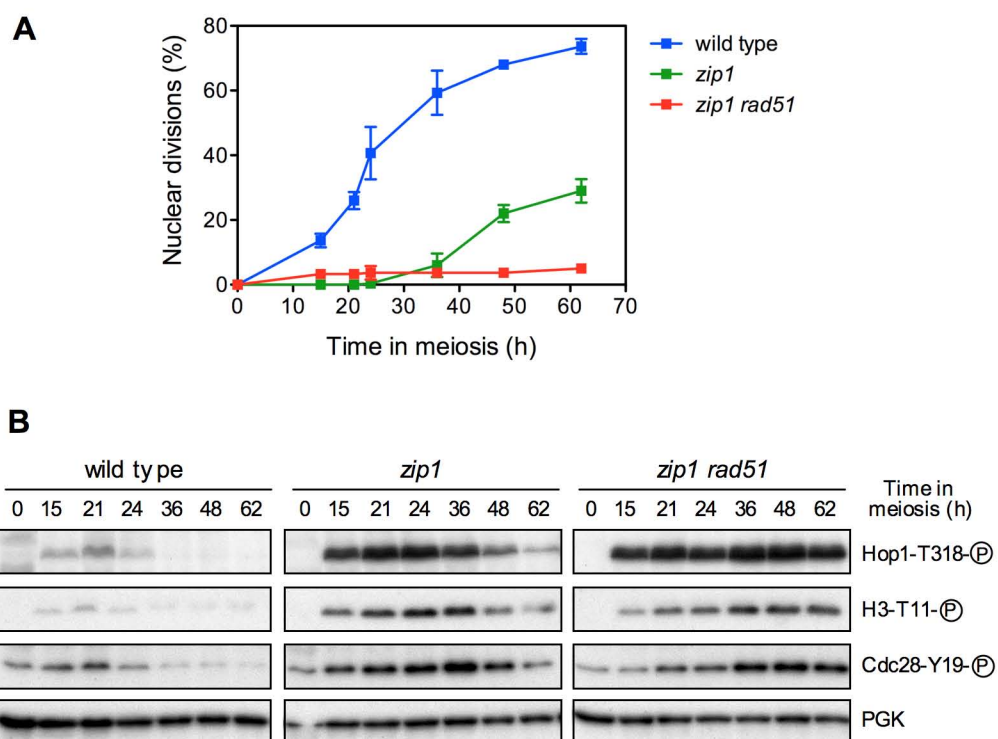

**Figure S7. Deletion of *RAD51* leads to sustained checkpoint activation and meiotic arrest in *zip1*.** (A) Time course analysis of meiotic nuclear divisions; the percentage of cells containing two or more nuclei is represented. Error bars: SD; n=3. (B) Western blot analysis of the indicated molecular markers of checkpoint activity. PGK was used as a loading control. Strains are DP1359 (wild type), DP1360 (*zip1*) and DP1364 (*zip1 rad51*).

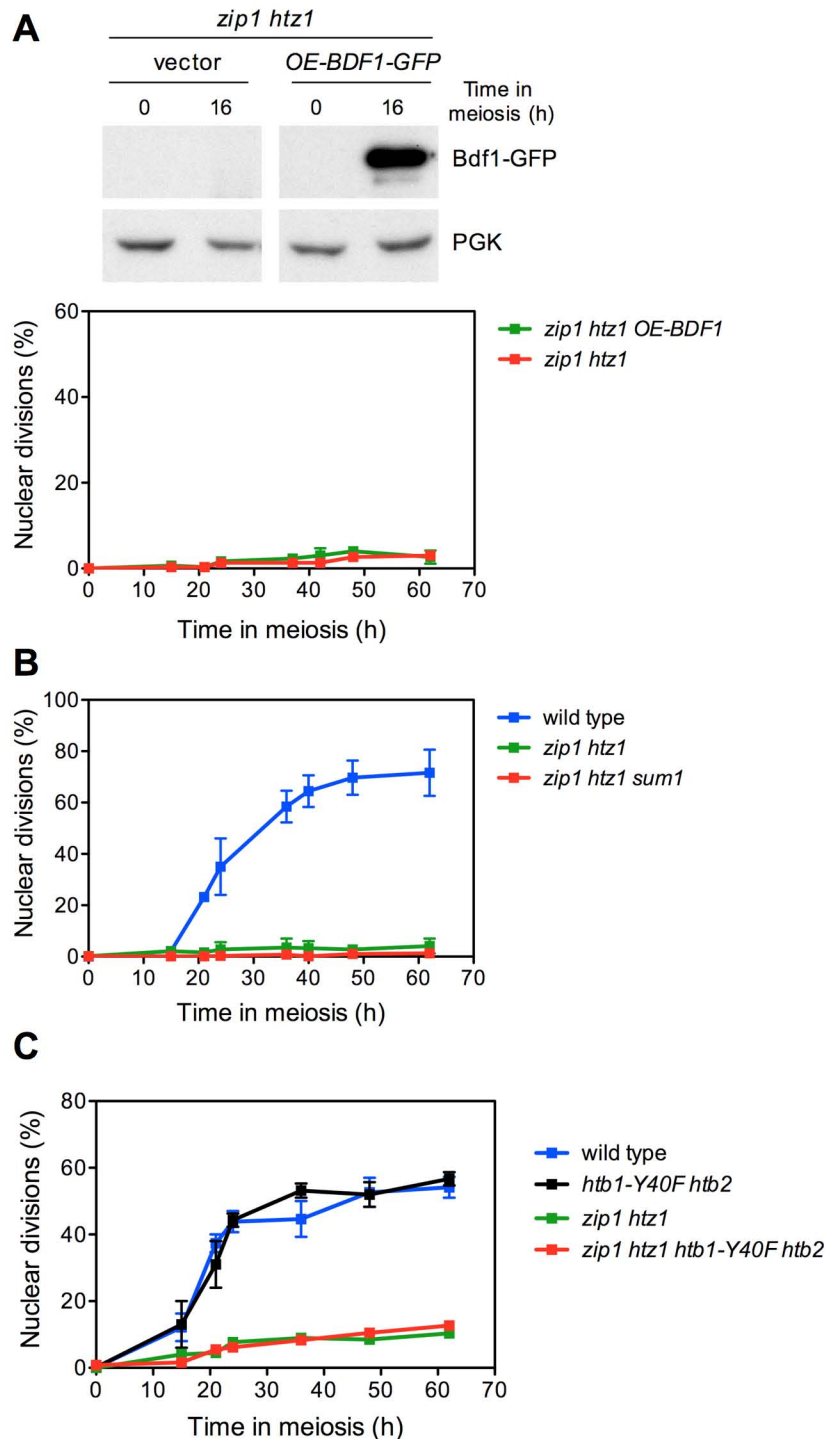

**Figure S8. Meiosis-specific overexpression of *BDF1*, deletion of *SUM1* and mutation of *H2B-Y40* do not suppress *zip1 htz1* arrest.** (A) Upper panel; western blot analysis of *zip1 htz1* cells (DP1017) transformed with vector (pSS248) or with a 2-micron plasmid expressing *BDF1-GFP* from the *HOP1* promoter (*OE-BDF1-GFP*; pSS354). Extracts were prepared at time zero or 16 hours after meiotic induction (around the peak of prophase) and analyzed with anti-GFP antibodies. PGK was used as a loading control. Lower panel; time course analysis of meiotic nuclear divisions in the same strains. The percentage of cells containing two or more nuclei is represented. Error bars: SD; n=3. (B) Time course analysis of meiotic nuclear divisions in the indicated strains. Wild type (DP421), *zip1 htz1* (DP630) and *zip1 htz1 sum1* (DP1441). Error bars: range; n=2. (C). Time course analysis of meiotic nuclear divisions in the indicated strains. Wild type (DP1445), *htb1-Y40F htb2* (DP1446), *zip1 htz1* (DP1449) and *zip1 htz1 htb1-Y40F htb2* (DP1450). Error bars: range; n=2.

**Table S1. *Saccharomyces cerevisiae* strains**

| Strain | Genotype                                                                     | Source    |
|--------|------------------------------------------------------------------------------|-----------|
| DP421  | <i>MATa/MATα leu2,3-112 his4-260 thr1-4 ura3-1 trp1-289 ade2-1 lys2ΔNhel</i> | PSS Lab   |
| DP422  | DP421 <i>zip1::LYS2</i>                                                      | PSS Lab   |
| DP437  | DP421 <i>ZIP1-GFP</i>                                                        | PSS Lab   |
| DP449  | DP421 <i>zip1::LYS2 DDC2-GFP::TRP1</i>                                       | PSS Lab   |
| DP590  | DP421 <i>dmc1::hphMX4 p306(BrdU-Inc)::URA3/ura3-1</i>                        | PSS Lab   |
| DP630  | DP421 <i>htz1::URA3</i>                                                      | This work |
| DP631  | DP421 <i>zip1::LYS2 htz1::URA3</i>                                           | This work |
| DP713  | DP421 <i>mek1::kanMX6</i>                                                    | PSS Lab   |
| DP776  | DP421 <i>zip1::LYS2 htz1::URA3 DDC2-GFP::TRP1</i>                            | This work |
| DP777  | DP421 <i>zip1::LSY2 htz1::URA3 swr1::natMX4 DDC2-GFP::TRP1</i>               | This work |
| DP804  | DP421 <i>swr1::natMX4 zip1::LSY2 DDC2-GFP::TRP1</i>                          | This work |
| DP815  | DP421 <i>zip1::LYS2 htz1::URA3 spo11::natMX4 DDC2-GFP::TRP1</i>              | This work |
| DP816  | DP421 <i>zip1::LYS2 htz1::URA3 ddc2::TRP1 sml1::KanMX6</i>                   | This work |
| DP838  | DP421 <i>ZIP1-GFP htz1::URA3</i>                                             | This work |
| DP839  | DP421 <i>zip1::LYS2 HTZ1-GFP::kanMX6</i>                                     | This work |
| DP840  | DP421 <i>HTZ1-GFP::kanMX6</i>                                                | This work |
| DP841  | DP421 <i>swr1::natMX4 HTZ1-GFP::kanMX6</i>                                   | This work |
| DP842  | DP421 <i>zip1::LYS2 swr1::natMX4 HTZ1-GFP::kanMX6</i>                        | This work |
| DP969  | SK1 <i>CEN8::tdTomato-LEU2/CEN8 THR1:mCerulean-TRP1/THR1</i>                 | S. Keeney |
| DP973  | SK1 <i>CEN8::tdTomato-LEU2/CEN8 THR1:mCerulean-TRP1/THR1 htz1::hphMX4</i>    | This work |
| DP974  | SK1 <i>CEN8::tdTomato-LEU2/CEN8 THR1:mCerulean-TRP1/THR1 mer3::hphMX4</i>    | This work |
| DP1016 | DP421 <i>htz1::hphMX4</i>                                                    | This work |
| DP1017 | DP421 <i>zip1::LYS2 htz1::hphMX4</i>                                         | This work |
| DP1056 | DP421 <i>htz1::URA3 swr1:: natMX4</i>                                        | This work |
| DP1113 | DP421 <i>zip1::LYS2 htz1::hphMX4 swe1::natMX4</i>                            | This work |
| DP1134 | DP421 <i>zip1::LYS2 htz1::hphMX4 MIH1-GFP::kanMX6</i>                        | This work |
| DP1144 | DP421 <i>htz1::URA3 spo11::ADE2</i>                                          | This work |
| DP1153 | DP421 <i>zip1::LYS2 cdc28-AF::LEU2</i>                                       | This work |
| DP1154 | DP421 <i>zip1::LYS2 htz1::hphMX4 cdc28-AF::LEU2</i>                          | This work |



|        |                                                                                                           |           |
|--------|-----------------------------------------------------------------------------------------------------------|-----------|
| DP1157 | DP421 <i>zip1::LYS2 swe1::LEU2</i>                                                                        | This work |
| DP1174 | DP421 <i>swr1::hphMX4</i>                                                                                 | This work |
| DP1185 | DP421 <i>TPR1-P<sub>GALI</sub>-ZIP1-GFP ura3::P<sub>GPD1</sub>-GAL4(848)ER::URA3/ura3-1</i>               | This work |
| DP1186 | DP421 <i>TPR1-P<sub>GALI</sub>-ZIP1-GFP P<sub>GPD1</sub>-GAL4(848)ER::URA3/ura3-1 htz1::hphMX4</i>        | This work |
| DP1259 | DP421 <i>htz1::URA3 mek1::kanMX6</i>                                                                      | This work |
| DP1353 | DP421 <i>3MYC-SWE1</i>                                                                                    | This work |
| DP1354 | DP421 <i>zip1::LYS2 3MYC-SWE1</i>                                                                         | This work |
| DP1359 | DP421 <i>TUB1/TUB1-GFP::TRP1</i>                                                                          | PSS Lab   |
| DP1360 | DP421 <i>zip1::LYS2 TUB1/TUB1-GFP::TRP1</i>                                                               | PSS Lab   |
| DP1364 | DP421 <i>zip1::LYS2 rad51::natMX4 TUB1/TUB1-GFP::TRP1</i>                                                 | PSS Lab   |
| DP1414 | DP421 <i>zip1::LYS2 htz1::hphMX4 3MYC-SWE1</i>                                                            | This work |
| DP1416 | DP421 <i>zip1::LYS2 htz1::hphMX4 cdc28-AF::LEU2 3MYC-SWE1</i>                                             | This work |
| DP1441 | DP421 <i>zip1::LYS2 htz1::URA3 sum1::natMX4</i>                                                           | This work |
| DP1445 | DP421 <i>[hta1-htb1]::kanMX6 [hta2-htb2]::natMX4 pSS347 (HTA1-HTB1)-TRP1</i>                              | This work |
| DP1446 | DP421 <i>[hta1-htb1]::kanMX6 [hta2-htb2]::natMX4 pSS348 (HTA1-htb1-Y40F)-TRP1</i>                         | This work |
| DP1449 | DP421 <i>zip1::LYS2 htz1::hphMX4 [hta1-htb1]::kanMX6 [hta2-htb2]::natMX4 pSS347 (HTA1-HTB1)-TRP1</i>      | This work |
| DP1450 | DP421 <i>zip1::LYS2 htz1::hphMX4 [hta1-htb1]::kanMX6 [hta2-htb2]::natMX4 pSS348 (HTA1-htb1-Y40F)-TRP1</i> | This work |
| DP1467 | DP421 <i>zip1::LYS2 3MYC-swe1-N584A</i>                                                                   | This work |
| DP1468 | DP421 <i>zip1::LYS2 htz1::hphMX4 3MYC-swe1-N584A</i>                                                      | This work |
| DP1523 | DP421 <i>spo11::ADE2</i>                                                                                  | This work |
| DP1524 | DP421 <i>zip1::LYS2 spo11::ADE2</i>                                                                       | This work |
| DP1525 | DP421 <i>zip1::LYS2 p306(BrdU-Inc)::URA3/ura3-1</i>                                                       | This work |
| DP1526 | DP421 <i>zip1::LYS2 htz1::hphMX4 p306(BrdU-Inc)::URA3/ura3-1</i>                                          | This work |

\* All strains are diploids isogenic to BR1919 (Rockmill and Roeder 1990), except strains DP969, DP973 and DP974, which are diploids isogenic to SK1. The haploid parents of DP969 (SK1) were obtained from S. Keeney (Thacker *et al.* 2011). Unless specified, all strains are homozygous for the indicated markers. DP421 is a *lys2* version of the original BR1919-2N.

Rockmill, B., and G. S. Roeder, 1990 Meiosis in asynaptic yeast. *Genetics* 126: 563-574.

Thacker, D., I. Lam, M. Knop and S. Keeney, 2011 Exploiting spore-autonomous fluorescent protein expression to quantify meiotic chromosome behaviors in *Saccharomyces cerevisiae*. *Genetics* 189: 423-439.

**Table S2. Plasmids**

| Plasmid | Vector           | Relevant parts                               | Source/Reference                 |
|---------|------------------|----------------------------------------------|----------------------------------|
| pTK17   | pUC19            | <i>htz1::URA3</i>                            | (SANTISTEBAN <i>et al.</i> 2000) |
| pJC29   | pRS426           | $2\mu$ <i>URA3 CDC5</i>                      | (JASPERSEN <i>et al.</i> 1998)   |
| pR2042  | pRS305           | <i>LEU2 cdc28-AF</i>                         | (LEU and ROEDER 1999)            |
| pR2045  | pRS426           | $2\mu$ <i>URA3 CLB1</i>                      | (LEU and ROEDER 1999)            |
| pSS263  | pRS426           | $2\mu$ <i>URA3 NDT80</i>                     | This work                        |
| pSS248  | pYES2 derivative | $2\mu$ <i>URA3 P<sub>HOP1</sub>-GFP</i>      | This work                        |
| pSS265  | pSS248           | $2\mu$ <i>URA3 P<sub>HOP1</sub>-GFP-MIHI</i> | This work                        |
| pSS345  | pRS316           | <i>CEN6 URA3 HTA1-HTB1</i>                   | This work                        |
| pSS347  | pRS314           | <i>CEN6 TRP1 HTA1-HTB1</i>                   | This work                        |
| pSS348  | pRS314           | <i>CEN6 TRP1 HTA1-htb1-Y40F</i>              | This work                        |
| pSS354  | pSS248           | $2\mu$ <i>URA3 P<sub>HOP1</sub>-GFP-BDF1</i> | This work                        |

JASPERSEN, S. L., J. F. CHARLES, R. L. TINKER-KULBERG and D. O. MORGAN, 1998 A late mitotic regulatory network controlling cyclin destruction in *Saccharomyces cerevisiae*. *Mol Biol Cell* **9**: 2803-2817.

LEU, J. Y., and G. S. ROEDER, 1999 The pachytene checkpoint in *S. cerevisiae* depends on Swe1-mediated phosphorylation of the cyclin-dependent kinase Cdc28. *Mol Cell* **4**: 805-814.

SANTISTEBAN, M. S., T. KALASHNIKOVA and M. M. SMITH, 2000 Histone H2A.Z regulates transcription and is partially redundant with nucleosome remodeling complexes. *Cell* **103**: 411-422.

**Table S3. Primary antibodies**

| Antibody                    | Host and type     | Application*<br>(Dilution) | Source / Reference                                 |
|-----------------------------|-------------------|----------------------------|----------------------------------------------------|
| Cdc2-Y15-P<br>(Cdc28-Y19-P) | Rabbit polyclonal | WB (1:1000)                | Cell Signaling Technology<br>#9111                 |
| Phospho-(S/T)Q              | Rabbit polyclonal | IF (1:200)                 | Cell Signaling Technology<br>#2851                 |
| Cdc5                        | Goat polyclonal   | WB (1:1000)                | Santa Cruz Biotechnology<br>sc-6733                |
| Cdc28<br>(PSTAIRE)          | Rabbit polyclonal | WB (1:1000)                | Santa Cruz Biotechnology;<br>sc53                  |
| Clb1                        | Goat polyclonal   | WB (1:100)                 | Santa Cruz Biotechnology;<br>sc-7647               |
| Hed1                        | Rabbit polyclonal | WB (1:20000)               | N. Hollingsworth<br>(CALLENDER <i>et al.</i> 2016) |
| Hed1-T40-P                  | Rabbit polyclonal | WB (1:50000)               | N. Hollingsworth<br>(CALLENDER <i>et al.</i> 2016) |
| Hop1-T318-P                 | Rabbit polyclonal | WB (1:1000)                | J. Carballo<br>(PENEDOS <i>et al.</i> 2015)        |
| H3-T11-P                    | Rabbit polyclonal | WB (1:2000)                | Abcam<br>ab5168                                    |
| Mek1                        | Rabbit polyclonal | WB (1:1000)                | PSS Lab<br>(ONTOSO <i>et al.</i> 2013)             |
| Ndt80                       | Rabbit polyclonal | WB (1:5000)                | M. Lichten<br>(BENJAMIN <i>et al.</i> 2003)        |
| Rad51                       | Rabbit polyclonal | IF (1:300)                 | Santa Cruz Biotechnology<br>sc-33626               |
| Myc                         | Rabbit polyclonal | WB (1:1000)                | Sigma<br>c3956                                     |
| Pch2                        | Rabbit polyclonal | IF (1:400)                 | PSS Lab / R. Freire                                |
| GFP (JL-8)                  | Mouse monoclonal  | WB (1:2000-10000)          | Clontech<br>632381                                 |
| PGK (22C5D8)                | Mouse monoclonal  | WB (1:2000)                | Invitrogene<br>459240                              |
| Tubulin (TAT1)              | Mouse monoclonal  | WB (1:10000)<br>IF (1:500) | K. Gull<br>(ACOSTA <i>et al.</i> 2011)             |

\*WB, western blot; IF, immunofluorescence

ACOSTA, I., D. ONTOSO and P. A. SAN-SEGUNDO, 2011 The budding yeast polo-like kinase Cdc5 regulates the Ndt80 branch of the meiotic recombination checkpoint pathway. *Mol Biol Cell* **22**: 3478-3490.

BENJAMIN, K. R., C. ZHANG, K. M. SHOKAT and I. HERSKOWITZ, 2003 Control of landmark events in meiosis by the CDK Cdc28 and the meiosis-specific kinase Ime2. *Genes Dev* **17**: 1524-1539.

CALLENDER, T. L., R. LAUREAU, L. WAN, X. CHEN, R. SANDHU *et al.*, 2016 Mek1 Down Regulates Rad51 Activity during Yeast Meiosis by Phosphorylation of Hed1. *PLoS Genet* **12**: e1006226.

ONTOSO, D., I. ACOSTA, F. VAN LEEUWEN, R. FREIRE and P. A. SAN-SEGUNDO, 2013 Dot1-dependent histone H3K79 methylation promotes activation of the Mek1 meiotic checkpoint effector kinase by regulating the Hop1 adaptor. *PLoS Genet* **9**: e1003262.

PENEDOS, A., A. L. JOHNSON, E. STRONG, A. S. GOLDMAN, J. A. CARBALLO *et al.*, 2015 Essential and Checkpoint Functions of Budding Yeast ATM and ATR during Meiotic Prophase Are Facilitated by Differential Phosphorylation of a Meiotic Adaptor Protein, Hop1. *PLoS One* **10**: e0134297.
